1 **A hyperthermoactive-Cas9 editing tool reveals the role of a unique arsenite**  
2 **methyltransferase in the arsenic resistance system of *Thermus thermophilus***  
3 **HB27**

4 Giovanni Gallo<sup>ad#</sup>, Ioannis Mougiakos<sup>bc#</sup>, Mauricio Bianco<sup>b</sup>, Miriam Carbonaro<sup>a</sup>,  
5 Andrea Carpentieri<sup>c</sup>, **Anna Illiano<sup>f</sup>**, Pietro Pucci<sup>f</sup>, Simonetta Bartolucci<sup>a</sup>, John van  
6 der Oost<sup>b\*</sup>, Gabriella Fiorentino<sup>adg\*</sup>

7  
8 <sup>a</sup>Department of Biology, University of Naples Federico II, Via Cinthia 21, 80126  
9 Napoli, Italy

10 <sup>b</sup>Laboratory of Microbiology, Wageningen University & Research, Stippeneng  
11 4, 6708WE Wageningen, The Netherlands

12 <sup>c</sup>Department of Chemical Sciences, University of Naples Federico II, Via Cinthia  
13 21, 80126 Napoli, Italy

14 <sup>d</sup>Consiglio Nazionale delle Ricerche CNR, Institute of Polymers, Composites  
15 and Biomaterials (IPCB), via Campi Flegrei, 34, 80078 Pozzuoli, Na, Italy

16 <sup>e</sup>Helmholtz Institute for RNA-based Infection Research (HIRI), Helmholtz-  
17 Centre for Infection Research (HZI), 97080 Würzburg, Germany

18 <sup>f</sup>**CEINGE-Biotecnologie avanzate, Via Comunale Margherita, 484-538, 80131**  
19 **Napoli NA**

20 <sup>g</sup>Task Force on Microbiome Studies, University of Naples Federico II, Naples,  
21 Italy

22 # These authors contributed equally to this work

23 \*Corresponding authors

24 e-mail: [fiogabri@unina.it](mailto:fiogabri@unina.it), [john.vanderoost@wur.nl](mailto:john.vanderoost@wur.nl)

25

26 Running title: New players in thermophilic arsenic resistance system

27

28 Keywords: Arsenic resistance; thermoresistance; extremophiles; *Thermus*  
29 *thermophilus*; CRISPR-Cas9 genome editing; genetic tool; bioreporter.

30

31 **Abstract**

32 Arsenic detoxification systems can be found in a wide range of organisms, from  
33 bacteria to man. In a previous study, we discovered an arsenic-responsive  
34 transcriptional regulator in the thermophilic bacterium *Thermus thermophilus*  
35 HB27 (*TtSmtB*). Here, we characterize the arsenic resistance system of *T.*  
36 *thermophilus* in more detail. We employed *TtSmtB*-based pull-down assays with  
37 protein extracts from cultures treated with arsenate and arsenite to obtain an S-  
38 adenosyl-Lmethionine (SAM)-dependent arsenite methyltransferase (*TtArsM*).  
39 *In vivo* and *in vitro* analyses were performed to shed light on this new component  
40 of the arsenic resistance network and its peculiar catalytic mechanism.  
41 Heterologous expression of *TtarsM* in *Escherichia coli* resulted in arsenite  
42 detoxification at mesophilic temperatures. Although *TtArsM* does not contain a  
43 canonical arsenite binding site, the purified protein does catalyze SAM-  
44 dependent arsenite methylation **with formation of monomethylarsenite (MMAs)**  
45 **and dimethylarsenite (DMAs)**. In addition, *in vitro* analyses confirmed the unique  
46 interaction between *TtArsM* and *TtSmtB*. Next, a highly efficient ThermoCas9-  
47 based genome-editing tool was developed to delete the *TtArsM*-encoding gene  
48 on the *T. thermophilus* genome and to confirm its involvement in the arsenite  
49 detoxification system. Finally, the *TtarsX* efflux pump gene in the *T.*  
50 *thermophilus*  $\Delta TtarsM$  genome was substituted by a gene encoding a stabilized

51 yellow fluorescent protein (sYFP) to create a sensitive genome-based bioreporter  
52 system for the detection of arsenic ions.

53

## 54 **Importance**

55 We here describe the discovery of an unknown protein by using a proteomic  
56 approach with a functionally related protein as bait. Remarkably, we successfully  
57 obtained a novel type of enzyme through the interaction with a transcription  
58 regulator, controlling the expression of this enzyme. Employing this strategy, we  
59 isolated *TtArsM*, the first thermophilic prokaryotic arsenite methyltransferase, as  
60 a new enzyme of the arsenic resistance mechanism in *T. thermophilus* HB27. The  
61 atypical arsenite binding site of *TtArsM* categorizes the enzyme as the first  
62 member of a new arsenite methyltransferase type, exclusively present in the  
63 *Thermus* genus. **The enzyme methylates arsenite producing MMAs and DMAs.**  
64 Furthermore, we developed an hyperthermophilic Cas9-based genome-editing  
65 tool, active up to 65°C. The tool allowed us to perform highly efficient, marker-  
66 free modifications (either gene deletion or insertion) in the *T. thermophilus*  
67 genome. With these modifications, we confirmed the critical role of *TtArsM* in  
68 the arsenite detoxification system and developed a sensitive *whole cell*  
69 bioreporter for arsenic ions. We anticipate that the developed tool can be easily  
70 adapted for editing the genomes of other thermophilic bacteria, significantly



71 boosting fundamental and metabolic engineering in hyperthermophilic  
72 microorganisms.

## 73 **Introduction**

74 Arsenic is the most abundant environmental toxic element which enters the  
75 biosphere mainly from geochemical and (to a lesser extent) anthropogenic  
76 sources such as herbicides, growth promoters for livestock, and industrial  
77 activities (1). Arsenic has two relevant oxidation states, trivalent arsenite As(III)  
78 and pentavalent arsenate As(V). Methylated arsenicals include mono- (MAs), di-  
79 (DMAs), and tri- (TMAs) methylated forms. In general, trivalent states are more  
80 toxic than the pentavalent ones, and TMAs is more toxic than inorganic arsenite.  
81 Although arsenic is not beneficial for life, it can enter cells through transporters  
82 such as aquaglyceroporins. Hence, arsenic detoxification systems can be found  
83 in a wide range of organisms, from bacteria to humans. Arsenic resistance genes  
84 (*ars*) include genes encoding efflux transporters, redox enzymes,  
85 methyltransferases, transcriptional repressors and biosynthetic pathways for  
86 arsenosugars and arsenolipids (2, 3). The identification and characterization of  
87 these pathways have attracted the attention of fundamental, evolutionary, and  
88 biotechnological research (4–6).

89 Microorganisms have been exposed to arsenic since the origin of life and  
90 consequently have evolved arsenic resistance systems, encoded by genes  
91 generally clustered in operons (7). The organization and number of the operons  
92 of arsenic resistance genes are highly variable between different species (8, 9),  
93 reflecting differences in the level of arsenic resistance. The key players of arsenic

94 detoxification are: (i) arsenate reductases (ArsC) that reduce intracellular  
95 arsenate to arsenite (10), (ii) efflux permeases responsible for arsenite transport  
96 outside the cell (11), and (iii) transcriptional repressors that are generally  
97 metalloregulatory proteins of the ArsR/SmtB family (12). In addition, arsenite  
98 can be methylated by arsenite *S*-adenosylmethionine methyltransferases (ArsM)  
99 into MMAs, DMAs and TMAs (13), after which **they can passively leave the cell**  
100 **or be** extruded by methylarsenite-specific efflux permease (ArsP) (14).

101 Based on recent molecular clock analyses, it has been concluded that arsenite  
102 efflux and arsenite methylation represented the core of microbial arsenic  
103 resistance systems before the rise of atmospheric oxygen (15). In such primordial  
104 anoxic environments, methyl-arsenicals could also have **the function** as  
105 antibiotics against competitor microbes; after the rise of atmospheric oxygen, the  
106 ArsM enzymes did become primary components of the arsenic detoxification  
107 machinery; nevertheless, in some microorganisms, they maintained their  
108 antibiotic activity (16, 17).

109 Hydrothermal hot springs, which can be considered environments with  
110 conditions similar to niches of primordial Earth, **may** contain high amounts of  
111 arsenic. **In these cases**, these hot springs are niches for arsenic-tolerant  
112 microorganisms, which play a critical role in the global arsenic biogeochemical  
113 cycle (18). **Although** the resistance mechanisms to inorganic arsenic have been  
114 studied in many microorganisms (19), the contribution of organo-arsenical

115 biotransformation in extreme environments is still at a stage of infancy. In this  
116 regard, only two algal thermoactive ArsM enzymes have been characterized to  
117 date (20).

118 The thermophilic bacterium *Thermus thermophilus* HB27, originally isolated  
119 from a volcanic hot spring in Japan (21), has an unusual genetic organization of  
120 its machinery to cope with arsenic toxicity. The currently identified arsenic  
121 resistance genes are randomly scattered in its genome (22), complicating the  
122 identification of all the genes involved. In previous studies, we elucidated some  
123 components of the arsenic resistance system of *T. thermophilus* HB27. We  
124 identified and characterized *TtSmtB*, the metalloregulatory transcriptional  
125 repressor that is responsible for the regulation of the arsenic detoxification  
126 system. *TtSmtB* recognizes and firmly binds to operator sequences in the  
127 promoter regions of the arsenite efflux gene (*TtarsX*) (23) and the arsenate  
128 reductase gene (*TtarsC*) (24, 25), efficiently repressing their transcription in the  
129 absence of arsenic ions. *TtSmtB* and *TtArsX* are also involved in cadmium  
130 sensing and export, respectively (23). In two *T. thermophilus* HB27 deletion  
131 mutant strains ( $\Delta TtarsX$  and  $\Delta TtsmtB$ ), tolerance to arsenate, arsenite and  
132 cadmium was significantly reduced compared to the wild type strain. Although  
133 these analyses confirmed the involvement of *TtArsX* and *TtSmtB* in the  
134 promiscuous resistance mechanism, the mutant strains could still grow at  
135 concentrations of arsenic up to 3 mM (22, 23). Notably, the genome of *T.*

136 *thermophilus* HB27 is not predicted to express arsenite methyltransferases or  
137 arsenite oxidases, suggesting the existence of unidentified component(s) of the  
138 *T. thermophilus* HB27 arsenic resistance system that cannot be predicted by *in*  
139 *silico* approaches, highlighting the need to employ an alternative experimental  
140 identification **method**.

141 Since members of the ArsR/SmtB family are a group of homodimeric proteins  
142 with a common HTH-winged helix DNA binding domain and heterogeneous  
143 metal-binding domain architectures and interaction modes (26), we hypothesized  
144 that *TtSmtB* could even form protein interactions with unknown, functionally-  
145 related protein partners.

146 In this study, using an integrated proteomic, biochemical and genetic approach,  
147 we provide a gain of insight into the arsenic resistance system of *T. thermophilus*  
148 HB27. We report the discovery of the first *T. thermophilus* HB27 arsenite  
149 methyltransferase, *TtArsM*. Moreover, we describe the development of a highly  
150 efficient, markerless Cas9-based genome-editing tool at temperatures up to 65°C.

151 Using this ThermoCas9 system, we demonstrated the *in vivo* involvement of  
152 *TtArsM* in arsenite detoxification. The newly developed genome editing tool was  
153 further validated constructing a very sensitive *whole cell* bioreporter system in  
154 which the *TtarsX* efflux transporter gene was substituted by **a gene encoding a**  
155 **thermo-adapted superfolder** yellow fluorescent protein (*syfp*) (27).

156 **Results**

157 **Exploring the protein-protein interactions of *TtSmtB***

158 A combined comparative and functional proteomic approach was employed to  
159 identify putative *TtSmtB* interacting proteins with a role in arsenite  
160 metabolism/detoxification. Purified recombinant His-tagged *TtSmtB* was bound  
161 to a Ni<sup>2+</sup>/NTA resin for protein pull-down assays using *T. thermophilus* HB27  
162 cell-free extracts (CFE) from cultures exposed either to arsenite or arsenate, or  
163 untreated CFE cultures used as control. SDS-PAGE separation of the pulled-  
164 down proteins eluted with 0.5 M imidazole, followed by LC-electrospray  
165 ionization (ESI)-MS/MS (28) and comparative analysis of the acquired data  
166 resulted in the identification of 51 cytosolic proteins that interact with *TtSmtB*  
167 (Table S1). Only five of these proteins are simultaneously present in CFE from  
168 cultures exposed to arsenite and arsenate but not in control CFE from the non-  
169 exposed cultures. Amongst these proteins, TTC0109 (Accession No. AAS80457,  
170 UniProt code Q72LF0) was predicted to be involved in the arsenic detoxification  
171 system (based on homology to annotated ArsR family transcriptional regulators)  
172 and to contain a C-terminal SAM-dependent methyltransferase domain (based on  
173 homology to annotated methyltransferase domain-containing proteins),  
174 suggesting a role in arsenic methylation. **To date**, there are no annotated arsenite  
175 SAM-dependent methyltransferases in the genome of *T. thermophilus* HB27 or  
176 the genomes of other thermophilic bacteria. Hence, we selected TTC0109 for

177 further investigation as a potential novel arsenite methyltransferase.

178

### 179 **Bioinformatic analysis of TTC0109**

180 BlastP analysis of TTC0109 translated sequence with sequenced microbial

181 genomes and evolutionary analysis conducted with MEGA X, demonstrated that

182 TTC0109 is highly conserved among the members of the *Thermus* genus (Fig. 1

183 A). Moreover, multiple sequence alignment of TTC0109 with characterized

184 prokaryotic arsenite methyltransferases (Fig. 1 B) showed that all the aligned

185 proteins contain a typical Rossmann fold (29). This fold contains a GxGxG motif

186 in a loop region, which presumably interacts with the carboxypropyl moiety of

187 SAM, and a highly conserved aspartic acid residue at the end of the  $\beta$ 2 strand

188 which forms hydrogen bonds with the ribose hydroxyls of the cofactor (30). In

189 the case of TTC0109, the predicted GxGxG motif is composed of G114, T115,

190 G116, T117, G118 residues and the conserved aspartic residue is D135 (29, 30).

191 On the other hand, the alignment shows that TTC0109 greatly differ from

192 characterized **ArsM proteins** in the remaining sequence (Fig. 1 B); nonetheless,

193 if TTC0109 is an arsenite methyltransferase, it would be evolutionarily distant

194 from other archaeal and bacterial arsenite methyltransferases, as shown in the

195 phylogenetic tree (Fig. 1 A), and therefore it could belong to a new type of

196 arsenite methyltransferase. Additionally, all the known arsenite

197 methyltransferases, including those in the alignment, possess at least two, usually

198 three, cysteines that are responsible for the binding of arsenite and its subsequent  
199 methylation (16, 31). TTC0109 contains a single cysteine residue at position 77,  
200 which is perfectly conserved in all the sequences analyzed (Fig. 1 B); hence,  
201 TTC0109 could be an arsenite methyltransferase with a distinct reaction  
202 mechanism.

203 Reasoning that the TTC0109 structure could provide more information regarding  
204 the function of TTC0109, we generated a structural model of the protein and  
205 performed molecular docking with arsenite and SAM (Fig. S1). The obtained  
206 model predicts that TTC0109 forms homodimers via its N-terminal moiety;  
207 molecular docking highlighted that arsenite could be coordinated by two  
208 histidines, H40 and H179, while C77 interacts with the methyl group of SAM  
209 (Fig. S1 A).

210 Although H40 and H179 residues are not conserved in characterized *ArsM*  
211 *proteins*, they are maintained at an identical position in the translated genomes of  
212 all *Thermus* species (five of them are shown in Fig. 1B); moreover, H40 is  
213 encompassed in a sequence motif (34-YRVFPTHSE-42) that shares 45% identity  
214 (underlined) with a sequence motif (101-YRLADRHVE-109) at the C-terminus  
215 of the *TtSmtB* metal-binding site (32), strengthening the hypothesis that H40  
216 could be involved in arsenite binding, and suggesting an evolutionary connection  
217 between the two proteins.

218 We proceeded with the generation of structural models of mutant proteins in



219 which the amino acids H40 or H179 were replaced with alanine residues  
220 producing TTC0109 H40A, TTC0109 H179A and C77 replaced with a serine  
221 residue producing TTC0109 C77S (Fig. S1 B, C, D). The predicted models  
222 showed that the substitution of either H40 or H179 with an alanine residue altered  
223 the 3D structure of TTC0109, whereas the effect of the cysteine to serine  
224 substitution had only a minimal effect (Fig. S1 C, D), supporting the hypothesis  
225 that this residue could have a functional role.

226

## 227 **TTC0109 is a novel arsenite methyltransferase**

228 A recombinant His-tagged version of TTC0109 was produced and purified to  
229 homogeneity from *E. coli* BL21-CodonPlus (DE3)-RIL cells transformed with  
230 pET30b(+)/*TtarsM* (predicted mass: 29.1 kDa) (Fig. S2 A). Gel filtration  
231 chromatography analysis agreed with the *in silico* predicted dimeric  
232 configuration of the protein, showing that the homodimer has a mass of  
233 approximately 64.5 kDa (Fig. S2 B). To determine whether TTC0109 had  
234 arsenite methyltransferase activity, a coupled spectrophotometric enzymatic  
235 assay based on the formation of S-adenosylhomocysteine (SAH) from SAM after  
236 transfer of methyl-group(s) on the substrate was employed (33, 34). In this case,  
237 the acceptor of methyl groups was As(III). SAH is degraded by SAH  
238 nucleosidase into S-ribosylhomocysteine and adenine; adenine deaminase acts  
239 on adenine producing hypoxanthine, which is converted into urate and hydrogen

240 peroxide (H<sub>2</sub>O<sub>2</sub>) by xanthine oxidase. The rate of production of H<sub>2</sub>O<sub>2</sub> is measured  
241 by an increase in absorbance at 510<sub>nm</sub> with the help of the colorimetric reagent  
242 3,5-dichloro-2-hydroxybenzenesulfonic acid (DHBS). Then, arsenite  
243 methyltransferase activity was assayed following the increase in absorbance at  
244 510<sub>nm</sub> (35). Preliminary assays were set up to assess the thermal stability of the  
245 different components, and consequently the optimal assay temperature;  
246 afterwards, the saturating concentrations of SAM and arsenite were determined.  
247 Therefore, the optimal assay conditions resulted: 50°C, 200 μM arsenite, 800 μM  
248 SAM and 3.1 μM of TTC0109. Under these conditions, the specific arsenite  
249 methyltransferase activity of TTC0109 was 4.5 mU/mg (Fig. 2 A). For this  
250 reason, hereafter, the TTC0109 protein will be denoted as *TtArsM*.

251 In order to characterize which products are formed upon As(III) methylation by  
252 *TtArsM*, we incubated 10 μM of *TtArsM* with As(III), GSH and SAM, at 65°C  
253 for 24 h; the mixture was then solubilized and analyzed by GC-MS. The results  
254 obtained are shown in Figure 2 C. Two sharp peaks at 2.92 min and 2.96 min  
255 attributed to MMAs and DMAs, respectively, are only visible in the enzyme  
256 mixture, as no peaks were recorded for the control sample (Fig. 2 B). The  
257 fragmentation spectra of MMAs and DMAs are reported in Fig 2 D and E. Peak  
258 areas corresponding to MMAs and DMAs were manually integrated, and the  
259 results are summarized in Figure S2 C.

260 The results of *in vitro* assays using purified *TtArsM* protein confirmed the ability

261 of the protein to methylate As(III) producing mono and dimethylated arsenic, the  
262 latter being the primary product. The oxidation state of the products could not be  
263 determined because the reactions were terminated with H<sub>2</sub>O<sub>2</sub>, which oxidized all  
264 arsenicals to pentavalent states.

265 Since the *in silico* predictions of *TtArsM* led to the hypothesis that C77, H40 and  
266 H179 were catalytic amino acids, three mutated versions of *TtarsM*, namely  
267 *TtarsM* C77S, *TtarsM* H40A and *TtarsM* H179A, were constructed, expressed in  
268 *E. coli* BL21-CodonPlus (DE3)-RIL cells and the corresponding *TtArsM* mutants  
269 were purified (Fig S3). Although the expression levels of the three mutant  
270 proteins are comparable (Fig S3), it was not possible to perform *in vitro*  
271 characterization of purified *TtArsM* H40A and *TtArsM* H179A, which  
272 precipitated in solution after purification; this phenomenon is probably due to  
273 protein instability, thus indicating the importance of these amino acids for  
274 *TtArsM* structure. On the other hand, the purification of soluble *TtArsM* C77S  
275 protein was possible, albeit with a lower yield compared to the wild type *TtArsM*.  
276 Nonetheless, using the previously mentioned coupled assay, this mutant enzyme  
277 did not show any *in vitro* arsenite methyltransferase activity, confirming that C77  
278 residue plays a role in *TtArsM* activity (Fig. 2 A). These *in vitro* results  
279 demonstrated that *TtArsM* has an arsenite methyltransferase activity and its  
280 distinct active site suggests a novel reaction mechanism when compared to other  
281 characterized arsenite methyltransferases (13, 36, 37).

282 ***TtSmtB* interacts with *TtArsM* and binds to its promoter**

283 This is the first study to report the protein-protein interaction of an ArsR/SmtB  
284 transcriptional regulator with a member of the arsenic detoxification system as  
285 identified by pull-down and mass spectrometry. For this reason, we decided to  
286 confirm the physical interaction between *TtSmtB* and *TtArsM* and to investigate  
287 the effect of different metals on *TtSmtB:TtArsM* interaction. A Co-IP assay was  
288 carried out upon incubation of purified *TtArsM* and *TtSmtB* either in the presence  
289 or in the absence of arsenite, arsenate, cadmium and antimony. The first three  
290 ions are *TtSmtB* effectors as their interaction weakens the binding to target  
291 promoters, while antimony has no effect on DNA recognition (32).  
292 Immunoprecipitation with anti-*TtSmtB* antibodies, followed by detection of the  
293 His-tagged *TtArsM* by anti-His-tag antibodies, showed that the two proteins  
294 interact and form a complex in the absence of arsenite and arsenate, confirming  
295 the existence of physical interaction between them (Fig. 3). No band was detected  
296 when the immunoprecipitation was carried out with the unrelated control protein  
297 *TtGalA* (38). Increasing arsenate and arsenite concentrations negatively affected  
298 the stability of *TtSmtB:TtArsM* complex; in fact, densitometric analysis of the  
299 Western-blot revealed up to a 3-fold decrease in the intensity of the band  
300 corresponding to the complex (at 1:100 protein:arsenic ratio) in the presence of  
301 both arsenate (Fig. 3 A) and arsenite (Fig. 3 B). Interestingly, the presence of  
302 cadmium had the opposite effect, enhancing by up to 2-fold the band intensity

303 (Fig. 3 C), suggesting that the interaction of this metal with the complex occurs  
304 with a different mechanism. Finally, the presence of antimony had a negligible  
305 effect on complex stability, in agreement with previous data showing that this  
306 metal ion is not an effector for *TtSmtB* (32) (Fig. 3 D).

307 Since *TtSmtB* is the transcriptional repressor of the genes involved in arsenic and  
308 cadmium resistance in *T. thermophilus* HB27 (22, 23), we hypothesized that it  
309 could also regulate *TtarsM* transcription. Sequence analysis of *TtarsM* promoter  
310 (*p<sub>arsM</sub>*), a 108 bp-long region upstream of *TtarsM* and encompassing the  
311 translation start codon revealed the presence of an inverted repeat region  
312 [GAAC(N14)CTTG] between positions -6 and -27 upstream of the start codon.  
313 The sequence overlaps -10 and -35 putative basal promoter region, is 100%  
314 identical to the *TtarsX* operator recognized by *TtSmtB* and matches the consensus  
315 binding sites of ArsR/SmtB proteins (39). Hence, we performed EMSA to  
316 investigate the capacity of purified *TtSmtB* to bind to the promoter region of  
317 *TtarsM*. *TtSmtB* binds to *p<sub>arsM</sub>* in a concentration-dependent manner, as shown  
318 by the gradual formation of lower mobility complexes and the gradual decrease  
319 of residual unbound DNA (Fig. 4 A, lanes 2-5); at 10  $\mu$ M protein, the complex  
320 hardly enters the gel, suggesting the formation of multiple dimers associated with  
321 target DNA (Fig. 4 A lane 6). This observation suggests that by interacting with  
322 the regulatory region *TtSmtB* controls *TtarsM* transcription in a way comparable  
323 to that already reported for other arsenic resistance genes, i.e. the arsenate

324 reductase, the arsenite/cadmium efflux transporter and itself (22, 23).  
325 Since the existence of a physical interaction between *TtSmtB* and *TtArsM* was  
326 established, we asked whether *TtArsM* influenced *TtSmtB* interaction with *p<sub>arsM</sub>*.  
327 Therefore, we pre-incubated 3  $\mu$ M of both proteins before performing an EMSA  
328 in the same conditions described above. Interestingly, when the two proteins are  
329 co-incubated, shifted bands can be observed (Fig 4 B lane 3, complex 3)  
330 corresponding to complexes of higher molecular weight in comparison to those  
331 generated or not by *TtSmtB* or *TtArsM*, respectively (Fig 4 B lane 2 complex 2  
332 and lane 4); this analysis indicates that *TtSmtB:TtArsM* multimeric complexes  
333 bind to the promoter and suggests that *TtSmtB:TtArsM* protein-protein  
334 interaction may function in either transcriptional and post-transcriptional control.  
335 Notably, very few studies in bacteria report protein-protein interactions of  
336 transcriptional regulators with the product of the genes they regulate (40, 41).

337

### 338 ***In vivo* activity of *TtArsM* and its catalytic mutants in *E. coli***

339 Aiming to explore the role of *TtArsM* in arsenite resistance *in vivo*, we challenged  
340 *E. coli* BL21-CodonPlus (DE3)-RIL strains transformed with plasmids  
341 expressing *TtArsM* and its catalytic mutants (*TtArsM* C77S, *TtArsM* H40A and  
342 *TtArsM* H179A) to grow in the presence of arsenite. Each recombinant strain was  
343 grown in the presence of different arsenite concentrations for 24-hours to  
344 determine the minimal inhibitory concentration (MIC) towards the metal ion.

345 *TtArsM*-expressing strain appeared to be more resistant to arsenite than the  
346 control strain (MIC 6 mM and 4.5 mM, respectively). Additionally, the strains  
347 expressing mutated *TtArsM* were inhibited by the presence of arsenite to the  
348 same extent as the control strain (Fig. 5). This shows that the heterologous  
349 expression of *TtArsM* in *E. coli* increases arsenite resistance even at mesophilic  
350 temperatures, indicating the role of *TtArsM* in arsenite detoxification. Moreover,  
351 the result obtained with the mutant strains demonstrates the role of C77, H40 and  
352 H179 in the catalytic function of *TtArsM*.

353

### 354 **Developing a hyperthermoactive Cas9 editing tool**

355 We further aimed to investigate *in vivo* the contribution of *TtArsM* to the arsenite  
356 detoxification mechanism via the deletion of the *TtarsM* gene from the *T.*  
357 *thermophilus* HB27 genome. Nonetheless, the currently available genome editing  
358 tool for *T. thermophilus* is time-consuming, not marker-free and not always  
359 efficient (42). For this purpose, we reasoned to develop a marker-free, plasmid-  
360 based, homologous recombination (HR) Cas9 counter-selection (CS) genome  
361 editing tool for *T. thermophilus* employing ThermoCas9, a thermotolerant and  
362 thermoactive Cas9 orthologue (43).

363 We initially evaluated the targeting efficiency of ThermoCas9 in *T. thermophilus*  
364 HB27. Therefore, a set of 3 vectors was constructed, namely pMK-ThermoCas9-  
365 NT, pMK-ThermoCas9-sp1 and pMK-ThermoCas9-sp2 (Fig. 6 A), by cloning

366 into the pMK18 vector (44) (i) the codon-harmonized version of the *thermocas9*  
367 gene under the transcriptional control of the constitutive *nqo* promoter (42), and  
368 (ii) the sgRNA expressing module under the transcriptional control of the  
369 constitutive 16S rRNA promoter, either with a non-targeting/control spacer (NT:  
370 5'- CTAGATCCGCAGTAACCCCATGG-3') or with spacers that target the  
371 *TtarsM* gene (sp1: 5'-GGGCGTTGGTGATGTGGGCCCTC-3' and sp2: 5'-  
372 CCACCTCCTCCTCCCGGTAAGGC-3'). The 3 vectors were used to transform  
373 *T. thermophilus* HB27, along with pMK-Pnqo-syfp vector (27) as transformation  
374 control. The cells were allowed to recover at 70°C, before being plated on  
375 selective agar plates and incubated overnight at 60°C, due to the sensitivity of  
376 pMK18 at temperatures above 65°C. The transformation efficiencies of pMK-  
377 ThermoCas9-sp1 and pMK-ThermoCas9-sp2 targeting vectors were  
378 significantly reduced compared to the transformation efficiency with the pMK-  
379 ThermoCas9-NT non-targeting vector (Fig. 6 B). Moreover, the transformation  
380 efficiency with the pMK-Pnqo-syfp vector was only slightly higher compared to  
381 the transformation efficiency with the pMK-ThermoCas9-NT vector (Fig. 6 B),  
382 which could be attributed to the significant size difference between the two  
383 vectors (7552 bp and 13554 bp, respectively). This result indicates that  
384 ThermoCas9 is expressed in *T. thermophilus* HB27 cells in an active and not  
385 toxic form, motivating the development of a ThermoCas9-based genome-editing  
386 tool.



387 We set out to develop and test the efficiency of an HR ThermoCas9 based CS  
388 genome editing tool in *T. thermophilus* HB27. For this purpose, we introduced  
389 an HR template for the deletion of the *TtarsM* gene into the 3 previously  
390 described ThermoCas9 vectors. The HR template was composed of the fused 1kb  
391 upstream and downstream flanking regions of the *TtarsM* gene (Fig. 6 C). The  
392 three resulting editing vectors, namely pMK-ThermoCas9-HR-NT, pMK-  
393 ThermoCas9-HR-sp1 and pMK-ThermoCas9-HR-sp2, were transformed into *T.*  
394 *thermophilus* HB27 cells, recovered at 70°C, and grown on selective agar plates  
395 overnight at 60°C. Colony PCR with genome-specific primers was subsequently  
396 employed to screen several colonies for each transformation (Fig. S4, Table S2).  
397 None of the colonies from the pMK-ThermoCas9-NT transformation were clean  
398  $\Delta TtarsM$  mutants (0/10 colonies), and only a small number of colonies were  
399 mixed wild type/ $\Delta TtarsM$  mutants (2/10 colonies) (Fig. S4 A, Table S2). On the  
400 other hand, almost all the screened colonies from the pMK-ThermoCas9-sp1  
401 transformation were clean  $\Delta TtarsM$  mutants (19/19 colonies) (Fig. S4 B, Table  
402 S2); most of the screened colonies from the pMK-ThermoCas9-sp2  
403 transformation were clean  $\Delta TtarsM$  mutants (13/18 colonies), and the remaining  
404 were mixed wild type/ $\Delta TtarsM$  mutants (5/18 colonies) (Fig. S4 C, Table S2);  
405 the latter result suggests that less efficient ThermoCas9 targeting is obtained  
406 when employing spacer 2. Subsequently, DNA sequencing on randomly selected  
407 clean  $\Delta TtarsM$  mutant colonies was performed to verify the correctness of the

408 genome editing (Fig. S4 D, Table S2).

409 Aiming to test the temperature limit of the developed ThermoCas9-based  
410 genome-editing tool, we repeated the editing experiment increasing the plating  
411 temperature to 65°C, corresponding to the temperature limit of the pMK18  
412 backbone for propagation. Under these conditions, the number of colonies  
413 formed upon transformation with the pMK-ThermoCas9-sp1 and pMK-  
414 ThermoCas9-sp2 was of 3 and 5 vectors, respectively, much lower compared to  
415 the corresponding numbers when the plating temperature was 60°C (Table S2).  
416 This can be ascribed to the high ThermoCas9 targeting activity at 65°C (43) and  
417 decreased vector stability at 65°C. Nonetheless, the DNA sequence of all the  
418 screened colonies confirmed that they were clean  $\Delta TtarsM$  mutants,  
419 demonstrating the high efficiency of the developed tool at 65°C (Fig. 6 D).

420 Finally, assuming that the curing of the editing plasmid from a  $\Delta TtarsM$  mutant  
421 strain would facilitate additional editing steps, we randomly selected a  $\Delta TtarsM$   
422 mutant colony for inoculation in liquid, antibiotic-free TM medium, for two  
423 culturing rounds at 65°C and then plated the cultures on TM agar plates with and  
424 without antibiotic. Multiple colonies were found on the antibiotic-free plate and  
425 no colonies on the plate supplemented with the antibiotic, demonstrating that the  
426 cells were cured from the edited vector. Seven of these colonies were randomly  
427 selected and the absence of the plasmid confirmed by colony PCR using  
428 *thermoCas9*-specific primers (Fig. S4 E).

429 Therefore, a marker-less HR-ThermoCas9-based CS genome editing tool was  
430 developed for *T. thermophilus* HB27, highly efficient at temperatures up to 65°C.  
431 Using this tool, a *T. thermophilus*  $\Delta TtarsM$  strain was constructed in less than 10  
432 days (including the plasmid curing process), expanding the repertoire of available  
433 genetic tools for this microorganism and considerably accelerating the required  
434 time for editing its genome. To the best of our knowledge, this is the highest  
435 temperature reported for a CRISPR-Cas9 based genome-editing tool to date.

436

#### 437 ***TtArsM* mutant is more sensitive to arsenite**

438 To compare the arsenic resistance of  $\Delta TtarsM$  to that of wild type *T. thermophilus*  
439 HB27, both strains were grown in TM liquid medium with different arsenite and  
440 arsenate concentrations for 24-hours (Fig. 7). As expected, the arsenite resistance  
441 of  $\Delta TtarsM$  was significantly lower than that of the wild type strain, with the  
442 corresponding MIC values being 18 mM and 40 mM, respectively (Fig. 7 A).  
443 Moreover, the resistance of the  $\Delta TtarsM$  strain to arsenate was comparable to the  
444 wild type strain (42 mM and 44 mM, respectively) (Fig. 7 B), in agreement with  
445 its role in arsenite **resistance**. This result confirmed that the thermoactive arsenite  
446 methyltransferase *TtArsM*, is involved in arsenite detoxification and is a novel  
447 component of the arsenic resistance machinery.

448

#### 449 **Developing a sensitive arsenic bioreporter**

450 In a previous study, we demonstrated that *TtArsX* is the arsenic efflux membrane  
451 protein of *T. thermophilus* HB27 and reported that a  $\Delta TtarsX$  mutant strain is  
452 more sensitive to arsenate and arsenite (23). In this study, we wanted to ascertain  
453 whether a strain lacking both *TtarsM* and *TtarsX* would be even more sensitive  
454 to arsenic ions than the single mutants  $\Delta TtarsX$  and  $\Delta TtarsM$  strains, and  
455 therefore could represent an even better bioreporter strain for arsenic detection.  
456 For this purpose, the HR ThermoCas9 based CS editing tool was employed to  
457 exchange *TtarsX* gene in the genome of the  $\Delta TtarsM$  strain with the *syfp* reporter  
458 gene (27), setting the expression of the encoded thermotolerant yellow  
459 fluorescence protein (sYFP) under the control of the arsenic responsive *TtarsX*  
460 promoter ( $p_{arsX}$ ). The employed editing vector, denoted as pMK-ThermoCas9-  
461 HR-*syfp*, contained a spacer that targets the *TtarsX* gene (5'-  
462 TTTCGACGGAGGAGGCCTTGGCC-3') and an HR-template composed of the  
463 1kb upstream flanking genomic region of *TtarsX* followed by *syfp* and the 1kb  
464 downstream flanking genomic region of *TtarsX*. Ten colonies grown after  
465 transformation of pMK-ThermoCas9-HR-*syfp* vector into *T. thermophilus*  
466  $\Delta TtarsM$  cells were screened by colony PCR with genome-specific primers and  
467 sequenced; eight of them were clean *T. thermophilus* HB27  $\Delta TtarsM$ - $\Delta TtarsX$   
468 (*syfp*) knock-in mutants (Fig. S5), also proving that the developed tool was highly  
469 efficient for gene insertions and substitutions.  
470 The double mutant strain was challenged with different arsenite and arsenate

471 concentrations in TM liquid medium. As shown in Figure 7A and 7B, arsenite  
472 resistance is strikingly lower (0.5 mM) compared to that of the wild type (40  
473 mM),  $\Delta TtarsM$  (18 mM) and  $\Delta TtarsX$  strains (3 mM) (23). Interestingly, the  
474  $\Delta TtarsM$ - $\Delta TtarsX$  (*syfp*) strain showed also lower resistance to arsenate  
475 compared to the single mutant  $\Delta TtarsX$  (2 mM and 3 mM, respectively) (22).  
476 To evaluate the sensitivity to arsenate and arsenite of the *whole cell* bioreporter  
477 system, exponentially growing cultures of *T. thermophilus* HB27  $\Delta TtarsM$ -  
478  $\Delta TtarsX$  (*syfp*) were treated with increasing concentrations of arsenite and  
479 arsenate and the intensity of the emitted fluorescence was compared (Fig. 8). The  
480 background fluorescence of the  $\Delta TtarsM$ - $\Delta TtarsX$  (*syfp*) strain was low,  
481 indicating that the system is repressed in the absence of metal ions. Moreover,  
482 the developed bioreporter system was able to detect arsenite and arsenate  
483 concentrations as low as 0.5  $\mu$ M (Fig. 8). This performance substantially  
484 overtakes the detection limit of the previously developed arsenite and arsenate  
485 bioreporter system, which was based on the *T. thermophilus*  $\Delta TtarsX$  strain and  
486 plasmid-based expression of the  $\beta$ -galactosidase (23).

487

## 488 Discussion

489 In this study, we aimed to identify novel proteins involved in the arsenic  
490 resistance system of *T. thermophilus* HB27 and employed *TtSmtB* as a starting  
491 point looking beyond its transcriptional regulation activity. As *TtSmtB* contains

492 a protein interaction domain (32), we set out to identify putative *TtSmtB*  
493 interacting proteins with a role in arsenic metabolism/detoxification, following  
494 an immunoprecipitation and comparative proteomics approach. This strategy led  
495 to the discovery of *TtArsM*, the first prokaryotic thermoactive arsenite SAM-  
496 dependent methyltransferase, evolutionarily distant from other known arsenite  
497 methyltransferases.

498 The original structure and activity mechanism of *TtArsM* was explored *in silico*.  
499 Like other arsenite methyltransferases known to date, *TtArsM* contains a C-  
500 terminal SAM-dependent methyltransferase domain and an N-terminal domain  
501 comprising only one (instead of the usually three) conserved cysteine; the other  
502 two catalytic cysteines required for arsenite coordination might be replaced by  
503 two histidines identified by docking analysis. Interestingly, H40 is part of an  
504 arsenite binding domain typical of many ArsR metalloregulatory proteins (45)  
505 and H179 is located close to the cysteine (C177) of the arsenite methyltransferase  
506 of the extremophilic alga *Cyanidioschyzon merolae* (46). Moreover, the  
507 conservation of these three amino acids among the putative arsenite  
508 methyltransferases in the *Thermus* genus supports their possible role in catalysis  
509 and suggests an adaptation in this group of microorganisms.

510 Indeed, the role of the cysteine and histidine residues in the structure-function of  
511 *TtArsM* predicted *in silico* was demonstrated by site-directed mutagenesis as the  
512 heterologous expression in *E. coli* of *TtArsM* mutants conferred lower arsenite

513 resistance than *TtArsM*.

514 To date, only for a few arsenite methyltransferases, the reaction mechanism has  
515 been reported (13, 20, 36, 37, 47). Those described possess three or at least two  
516 cysteine residues present in their catalytic site that can methylate the arsenic  
517 sequentially in its trivalent form through alternating reduction and oxidative  
518 methylation reactions; noteworthy, different enzymes produce mono- di- and tri-  
519 methylated forms of arsenic in diverse amounts, highlighting a biochemical  
520 diversity in the arsenite methylation mechanism (36). The newly discovered  
521 *TtArsM*, highly conserved within *Thermus* genus, possesses only one cysteine,  
522 and can methylate As(III) mainly into DMAs and a smaller amount of MMAs as  
523 determined by GC-MS analysis of the products of the *in vitro* assay. To the best  
524 of our knowledge, this is the first arsenite methyltransferase functioning with a  
525 single cysteine in the active site.

526 The discovered transcriptional and post-translational interaction of *TtArsM* with  
527 the transcriptional regulator *TtSmtB* was investigated in more detail. It was  
528 demonstrated that *TtSmtB* binds to the promoter region of *TtarsM* and that this  
529 binding is stabilised by the *TtSmtB:TtArsM* complex. Moreover, Co-IP  
530 experiments confirmed the interaction of *TtSmtB* with *TtArsM* and showed a  
531 reverse correlation between the stability of the complex and arsenic  
532 concentration. Presumably, the complex enhances the repression of *TtarsM*  
533 transcription in the absence of arsenic ions through a novel mechanism. Hence,

534 through this analysis, we shed light on a novel kind of interaction, rarely  
535 described for bacteria, in which the transcriptional repressor of a gene interacts  
536 with the protein product of the gene that it regulates (41, 48).

537 An example of an enzyme that can modulate the transcriptional activity of  
538 regulators by protein-protein interaction is reported in the cysteine metabolism  
539 of *Bacillus subtilis* where the stable complex formed by CymR (the master  
540 regulator of the system) and CysK (*O*-acetyl-L-serine-thiol-lyase) represses the  
541 transcription of the genes involved in the cysteine pathway (including *cysK* gene  
542 itself) when cysteine concentration is low. The advantage of this regulatory  
543 mechanism is that it employs enzymes that can specifically recognize their  
544 substrates or allosteric effectors; thus, enzymes and/or transcriptional regulators  
545 can act simultaneously as intracellular molecular sensors and participate to their  
546 own transcriptional regulation (40).

547 The role of *TtArsM* in *T. thermophilus* HB27 arsenic detoxification was also  
548 demonstrated *via* the construction and characterization of a  $\Delta TtarsM$  mutant  
549 strain. For this purpose, a marker-free, homologous recombination and  
550 ThermoCas9 based counter-selection genome editing tool was developed, which  
551 was highly efficient and active at temperatures up to 65°C. **Our tool equals** the  
552 highest reported temperature for a Cas9-based editing tool to date (49, 50). The  
553 characterization of the *T. thermophilus*  $\Delta TtarsM$  strain confirmed its expected  
554 higher sensitivity to arsenite, but not arsenate, compared to the wild type strain.



555 To better define the role of *TtArsM* in the context of the already characterized  
556 components of the arsenic resistance system, a double mutant was constructed  
557 upon exchanging the *TtarsX* efflux pump gene in the *T. thermophilus*  $\Delta TtarsM$   
558 genome with the gene encoding the yellow fluorescent protein; the double mutant  
559 resulted much more sensitive to arsenite and arsenate treatment. Hence, it was  
560 demonstrated that *TtArsM* and *TtArsX* are critical players of the arsenite  
561 detoxification system. This is the first example of a successfully insertion of a  
562 heterologous gene on the *T. thermophilus* genome by genome editing. The double  
563 mutant strain was also considered as a sensitive bioreporter for the development  
564 of a *whole cell* biosensor system. Indeed, it was able to detect arsenite and  
565 arsenate concentrations as low as 0.5  $\mu\text{M}$ , showing 40 times higher sensitivity  
566 when compared to the previously developed *T. thermophilus* HB27  $\Delta TtarsX$ -  
567 plasmid-based biosensor (23).

568 In conclusion, this study explores a unique strategy to identify novel enzymes  
569 and/or regulative networks in non-model bacteria and expands the repertoire of  
570 genetic systems for hyperthermophiles. In addition, this work has resulted in a  
571 gain of insight into the arsenite/arsenate detoxification mechanism, particularly  
572 in that of *T. thermophilus*. On top of that, this has allowed us to develop a highly  
573 robust and sensitive biosensor.

574 **Materials and Methods**

575 ***T. thermophilus* HB27 cell-free extract preparation**

576 *T. thermophilus* HB27 cultures were grown aerobically at 70°C in TM medium,  
577 as previously described (24). Once the cultures reached 0.5 OD<sub>600nm</sub>, they were  
578 treated either with 8 mM NaAsO<sub>2</sub> or with 12 mM NaH<sub>2</sub>AsO<sub>4</sub> (Sigma) [the used  
579 concentrations were below the previously reported MIC values for arsenate and  
580 arsenite (22, 23)] or they remained untreated. Samples were harvested from each  
581 culture, either immediately after treatment or 60 min post-treatment. The samples  
582 were centrifuged, the precipitates were resuspended in phosphate buffer (20 mM  
583 Na<sub>3</sub>PO<sub>4</sub> pH 7.5) supplemented with protease inhibitor cocktail (Thermo  
584 Scientific) and the resuspended cells were lysed by sonication (10 cycles:  
585 30''on/30''off, power 40%, Misonix® Sonicator Ultrasonic Processor XL). The  
586 lysates were centrifuged and the cell-free extracts (CFE) used for pull-down  
587 assays.

588

589 **Purification of recombinant *TtSmtB*, Immobilized Metal Affinity**

590 **Chromatography (IMAC) and pull-down**

591 C-terminal His-tagged *TtSmtB* was purified from *E. coli* BL21-CodonPlus  
592 (DE3)-RIL cells transformed with the pET28/*TtsmtB* vector, as previously  
593 described (22). Purified C-terminal His-tagged *TtSmtB* (2 mg), was incubated  
594 with 200 µL of Ni<sup>2+</sup>-NTA resin (Sigma-Aldrich) equilibrated in 20 mM Na<sub>3</sub>PO<sub>4</sub>,

595 0.5 M NaCl, 20 mM imidazole, pH 7.5 for 16 h at 4°C and then washed three  
596 times with the same buffer to remove unbound proteins. *T. thermophilus* HB27  
597 CFE, treated with arsenite, or treated with arsenate, or not treated were incubated  
598 with the functionalized resin (Ni<sup>2+</sup>-NTA/*Tt*SmtB) for 16 h at 4°C under stirring  
599 conditions. Subsequently, the resin was extensively washed and the interacting  
600 proteins were eluted with 20 mM Na<sub>3</sub>PO<sub>4</sub>, 0.5 M NaCl, 0.5 M imidazole; pH 7.5.  
601 As negative controls, samples of Ni<sup>2+</sup>-NTA resin not functionalized with *Tt*SmtB  
602 were incubated with the same *T. thermophilus* HB27 CFE.

603

#### 604 ***In situ* hydrolysis and LC-MS/MS analysis**

605 The fractions eluted from the pull-down process were analyzed by 15 % SDS-  
606 PAGE and *in situ* hydrolyzed for mass spectrometry analysis. Specifically,  
607 mono-dimensional SDS-PAGE gel was coloured with Coomassie Brilliant Blue;  
608 the revealed bands were cut and de-stained with 100 µL of 0.1 M ammonium  
609 bicarbonate (AMBIC) and 130 µL of acetonitrile (ACN). Each band was  
610 hydrolyzed *in situ* with 0.1 µg/µL trypsin in 10 mM AMBIC, incubated at first  
611 for 1.5 h at 4°C and then for an additional 16 h at 37°C. The hydrolysis reactions  
612 were stopped by adding acetonitrile and 0.1% formic acid; then, the samples were  
613 filtered and dried in a Savant vacuum centrifuge before being analyzed by LC-  
614 MS/MS mass spectrometry. In detail, before analysis, the samples were dissolved  
615 in 10 µL of 0.1% formic acid, and 5 µL were directly loaded into the instrument.

616 Reverse-phase capillary liquid chromatography (HPLC 1200 system  
617 experiments), followed by MS analysis, was performed using a binary pump  
618 system connected to a nano-spray source of the mass spectrometer (28, 51). The  
619 latter is represented by a hybrid Q-TOF spectrometer (MS CHIP 6520 QTOF)  
620 equipped with a chip (Agilent Technologies).

621

### 622 *In silico* analysis

623 Analysis of the LC-MS/MS data, using Mascot software  
624 ([http://www.matrixscience.com/search\\_form\\_select.html](http://www.matrixscience.com/search_form_select.html)) allowed the  
625 identification of putative *TtSmtB*-interacting proteins. Among these proteins,  
626 TTC0109 (UniProt code Q72LF0), herein named *TtArsM*, was further analyzed  
627 using the UniProt database (<http://www.uniprot.org>); homologous proteins and  
628 conserved domains were identified by performing a Blast analysis  
629 (<https://blast.ncbi.nlm.nih.gov/Blast.cgi>).

630 Phylogenetic tree of archaeal and bacterial arsenite methyltransferases, SAM-  
631 dependent methyltransferases and methyltransferase domain-containing proteins,  
632 including *TtArsM* from *T. thermophilus* HB27, was conducted in MEGA X (52).

633 The amino acidic sequences used for the construction of the phylogenetic tree are  
634 *TtArsM* from *T. thermophilus* HB27, arsenite methyltransferase from  
635 *Rhodopseudomonas palustris* (13), *Methanosarcina acetivorans*, *Clostridium sp*  
636 BMX (53), *Halobacterium salinarum* (54), *Pseudomonas alcaligenes* (36),

637 *Cyanidioschyzon merolae* (46); a SAM-dependent methyltransferase from 5  
638 members of the *Thermus* genus (*islandicus*, *caldilimi*, *antranikianii*, *oshimai* and  
639 *brockianus*); a SAM-dependent methyltransferase from *Mesorhizobium*  
640 *amorphae*, *Anaerolineae bacterium*; a methyltransferase domain-containing  
641 protein from *Sanguinobacter* sp. Phylogenetic reconstruction was accomplished  
642 using the maximum likelihood statistical method.

643 The alignment of *TtArsM* to its templates was based on a multiple sequence  
644 alignment, performed with the program Clustal Omega (55); the amino acidic  
645 sequences used for the construction of the alignment of functionally  
646 characterized archaeal and bacterial arsenite methyltransferases are: *TtArsM*  
647 from *T. thermophilus* HB27, 5 members of the *Thermus* genus (*islandicus*,  
648 *caldilimi*, *antranikianii*, *oshimai* and *brockianus*), *Clostridium* sp BMX, *R.*  
649 *palustris*, *M. acetivorans*, *H. salinarum*, *P. alcaligenes* and *Cyanidioschyzon*  
650 *merolae* (46).

651 Models of *TtArsM* were generated through I-TASSER (56)  
652 (<https://zhanglab.ccmb.med.umich.edu/I-TASSER/>) using as input the complete  
653 sequence of *TtArsM* (C-score = -2.5). The dimeric structure was predicted using  
654 the GalaxyWEB tool (<http://galaxy.seoklab.org/index.html>) (57). The molecular  
655 dockings of *TtArsM* with arsenite and SAM were generated using the Hex  
656 Protein Docking server (58). 100 rigid-body docking solutions were generated  
657 per case and the best 10 were refined by energy minimization. The proposed

658 model for the metal ion docked into *TtArsM* is the structure with the smallest  
659 distance between arsenite-histidine and cysteine-SAM (4.33 Å from H40 and  
660 5.77 Å from H179 in *TtArsM* model and 4.40 Å from C77).

661

## 662 **Cloning, expression and purification of recombinant *TtArsM* and *TtArsM*** 663 **mutants**

664 The pET30b(+)/*TtarsM* vector was constructed for the expression and  
665 subsequent purification of the C-terminal His-tagged version of *TtArsM*. For the  
666 construction of the pET30b(+)/*TtarsM*, *TtarsM* gene was PCR amplified from *T.*  
667 *thermophilus* HB27 genome, using Taq DNA polymerase (Thermo Fisher  
668 Scientific) and primers containing the NdeI (*arsMfw*, Table S3) and HindIII  
669 (*arsMrv*, Table S3) restriction sites at their 5'-ends. The PCR product was  
670 purified, digested with the NdeI and HindIII restriction enzymes (NEB), and  
671 ligated (T4 ligase, NEB) into NdeI/HindIII-digested pET30b(+) vector  
672 (Novagen). The ligase mixture was transformed into *E. coli* TOP10F' cells were  
673 plated on LB agar plates supplemented with 50 µg/mL kanamycin (Sigma-  
674 Aldrich). Single colonies were selected and inoculated in LB liquid medium  
675 supplemented with 50 µg/mL kanamycin. Plasmid isolation and sequencing were  
676 subsequently performed before transforming *E. coli* BL21-CodonPlus (DE3)-  
677 RIL cells with pET30b(+)/*TtarsM* vector.

678 To obtain mutation of *TtarsM* gene sequence at specific sites, the QuickChange

679 II-E Site-Directed Mutagenesis Kit (Agilent Technologies) was employed;  
680 pET30b(+)/*TtarsM* was used as a template and amplified with three different  
681 mutagenic primer pairs (Table S3) to get pET30b(+)/*TtarsM* C77S,  
682 pET30b(+)/*TtarsM* H40A and pET30b(+)/*TtarsM* H179A vectors. The reaction  
683 mixtures were transformed into *E. coli* TOP10F' cells were plated on LB agar  
684 plates supplemented with kanamycin (50 µg/mL). Single colonies were randomly  
685 selected and inoculated in LB liquid medium supplemented with kanamycin (50  
686 µg/mL). Plasmid isolation was subsequently performed and *E. coli* BL21-  
687 CodonPlus (DE3)-RIL cells were transformed with sequence-verified  
688 pET30b(+)/*TtarsM* C77S, pET30b(+)/*TtarsM* H40A and pET30b(+)/*TtarsM*  
689 H179A vectors.

690 For protein expression of the His-tagged versions of *TtArsM* C77S, *TtArsM*  
691 H40A and *TtArsM* H179A catalytic mutants, the recombinant *E. coli* BL21-  
692 CodonPlus (DE3)-RIL strains were cultured in LB medium supplemented with  
693 kanamycin (50 µg/mL) and chloramphenicol (33 µg/mL). Protein expression was  
694 induced via the addition of 1 mM isopropyl-1-thio-β-D-galactopyranoside  
695 (IPTG) when the cultures reached 0.7 OD<sub>600nm</sub>. The cultures were further  
696 incubated with vigorous shaking at 37°C for 16 h, then centrifuged, resuspended  
697 in lysis buffer (20 mM NaP pH 7.4, 50 mM NaCl and 20 mM imidazole)  
698 supplemented with protease inhibitor cocktail (Thermo Scientific) and lysed by  
699 sonication (10 cycles: 30''on/30''off, power 40%, Misonix® Sonicator

700 **Ultrasonic Processor XL**). The lysates were centrifuged and the supernatants used  
701 for the purification on HisTrap HP columns (1 mL; GE Healthcare) connected to  
702 an AKTA Explorer system (GE Healthcare). The fractions containing His-tagged  
703 *TtArsM* proteins were eluted from the columns using a linear gradient of the  
704 elution buffer (20 mM NaP pH 7.4, 50 mM NaCl and 500 mM Imidazole). The  
705 eluted protein fractions were subjected to SDS-PAGE analysis and the fractions  
706 containing purified *TtArsM* were pooled and dialyzed for 16 h at 4°C in 20 mM  
707 NaP pH 7.4 buffer supplemented with protease inhibitor cocktail (Thermo  
708 Scientific). The identity of the purified His-tagged *TtArsM* protein was  
709 confirmed by mass spectrometry and protein aliquots were stored at -20°C.

710

#### 711 ***TtArsM* quaternary structure assessment**

712 The native molecular mass of *TtArsM* was determined by loading 500 µg of the  
713 purified protein onto an analytical Superdex PC75 column (3.2 by 30 cm)  
714 connected to an AKTA Pure system, in 50 mM Tris-HCl, pH 7.5, 0.2 M KCl  
715 buffer. The column was calibrated using a set of gel filtration markers (low range,  
716 GE Healthcare), including Ovalbumin (43.0 kDa), Carbonic anhydrase (29.0  
717 kDa), RNase A (13.7 kDa) and Aprotinin (6.5 kDa) as previously described (24).

718

#### 719 **Methyltransferase activity assay**

720 According to the manufacturer's protocol, the *TtArsM* arsenite methyltransferase



721 activity was measured using the SAM510: SAM Methyltransferase Assay Kit  
722 (G-Biosciences) with modifications regarding the temperature, the SAM  
723 concentration and the reaction time (33–35). The assay relies on the degradation  
724 of **S**-adenosylhomocysteine (**SAH**) into urate and hydrogen peroxide by a  
725 mixture of enzymes (adenosylhomocysteine nucleosidase, adenine deaminase,  
726 xanthine oxidase). Then, the reaction of hydrogen peroxide with 4-  
727 aminoantipyrine produces 5-dichloro-2-hydroxybenzene sulfonic acid (DHBS)  
728 with  $\epsilon_{mM}=15.0$  at 510<sub>nm</sub>. A typical reaction mixture containing: 200  $\mu$ M As(III),  
729 800  $\mu$ M SAM, **3.1  $\mu$ M** of the enzyme, SAM enzyme mixture and SAM  
730 colorimetric mix in a final reaction volume of 115  $\mu$ L, was incubated for 1h at  
731 50°C in a Synergy™ HTX Multi-Mode Microplate Reader (BioTek). The same  
732 reaction mixture was tested with 10  $\mu$ g of *TtArsC* or 10  $\mu$ g of *TtSmtB*, as negative  
733 controls. One unit of arsenite methyltransferase produces 1.0  $\mu$ mol of DHBS per  
734 minute at 50°C under the conditions described above. Preliminary assays were  
735 performed to define substrate saturating concentrations, varying the As(III) and  
736 SAM concentrations from 50  $\mu$ M to 300  $\mu$ M and from 200  $\mu$ M to 1.2 mM,  
737 respectively.

738

### 739 **In vitro arsenite methylation**

740 **As(III) methylation by *TtArsM* was determined in an assay solution containing**

741 **10  $\mu$ M *TtArsM*, 250  $\mu$ M As(III), 6 mM glutathione (GSH) and 1 mM SAM, in**

742 Na-phosphate 50 mM, pH 7.4 at 65°C for 24 h; the same reaction without *TtArsM*  
743 was used as the negative control (control sample). The reactions were terminated  
744 by the addition of 10% (v/v) H<sub>2</sub>O<sub>2</sub>. The oxidized solution samples were filtered  
745 through 0.22 µm MCE syringe filters and used for GC-MS analysis.  
746 For the detection of the methylated products, GC analyses were performed using  
747 Agilent GC 6890, coupled with a 5973 MS detector.  
748 200 µl of the control sample and the enzyme mixture were treated with 800 µL  
749 of methanol (Sigma-Aldrich). The supernatants were recovered and dried under  
750 vacuum. The samples were solubilized in methanol (10 µl) and 1 µl was analyzed  
751 by GC-MS. The column used was an HP5 capillary (30 m × 0.25 mm, 0.25 µm,  
752 5% polysilarylene 95% PDMS). Helium was used as the carrier gas at a rate of 1.0  
753 mL min<sup>-1</sup>. The GC injector was maintained at 230 °C, while the oven temperature  
754 was held at 40 °C for 5 min and then increased to 280 °C at 20 °C/min and held  
755 for 5 min for a total separation time of 20 min. The analyzer temperature was  
756 kept at 250 °C. The collision energy was set to a value of 70 eV, and fragment  
757 ions generated were analyzed mass range 20–450 m/z. The identification of each  
758 compound was based on the combination of retention time and fragmentation  
759 spectra matching those collected into the NIST 05 Mass Spectral Library. The  
760 identification was reliable when the matching values were higher than 700  
761 according to the NIST guidelines (59). The analyses were performed in triplicate  
762 for each sample.

763 **Co-IP assay**

764 Protein-protein interaction between *TtSmtB* and *TtArsM* was *in vitro* verified via  
765 co-immunoprecipitation assays that employed recombinant *TtSmtB*,  
766 recombinant His-tagged-*TtArsM*, anti-*TtSmtB* antibodies (GeneCust™) and His-  
767 tag antibodies (Sigma-Aldrich). His-tag removal from recombinant *TtSmtB* was  
768 performed as previously described (22).

769 A typical Co-IP mixture contained 1 mL of Co-IP buffer (50 mM Tris-HCl, pH  
770 7.5, 150 mM NaCl, 10% glycerol and 0.1% Triton X-100), 5 µg of *TtSmtB*, 5 µg  
771 of His-tagged *TtArsM* and was incubated at 4°C for 2h in continuous rotation. In  
772 some cases, arsenite, arsenate, cadmium and antimony at 1:0, 1:25, 1:50, 1:100  
773 molar ratios pre-incubated with *TtSmtB* for 10 min at 60°C were added. As  
774 controls, *TtArsM* (5 µg), *TtSmtB* (5 µg) and *TtGalA* (38) were also separately  
775 incubated under the same conditions. All the samples were subjected to  
776 immunoprecipitation using 2 µL of purified anti-*TtSmtB* antibodies (2 µg/µL)  
777 (GeneCust™) for 3 h at 4°C in continuous rotation, before adding 15 µL of  
778 Protein A-Sepharose beads (Sigma-Aldrich) and allowing the incubation to  
779 continue for further 16 h at 4°C. The formed immunocomplexes were washed  
780 with Co-IP buffer and analyzed by Western Blot on 15% SDS-PAGE, using  
781 PVDF membranes (Millipore) and anti-poly-Histidine-Peroxidase antibodies  
782 (Sigma-Aldrich) diluted 1:10000, as previously described (60).

783 The ImageJ software (<https://imagej.net/>) was used for densitometric analysis of

784 the formed bands, setting as maximum value the intensity of the band of the  
785 sample containing *TtArsM* and *TtSmtB* in the absence of any metal. Each  
786 experiment was performed in three technical and two biological replicates;  
787 statistical analysis was performed using one-way ANOVA and significant  
788 differences are indicated as \*  $p < 0.05$ , \*\*  $p < 0.01$ , \*\*\*  $p < 0.001$ .

789

### 790 **Electrophoretic mobility shift assay (EMSA)**

791 Electrophoretic mobility shift assays (EMSA) were performed to determine the  
792 *in vitro* binding of *TtSmtB* to the promoter region upstream *TtarsM*. The 108 bp  
793 chromosomal region that encompasses the start codon of the *TtarsM* gene and  
794 the 105 bp-long region upstream, denoted as *p<sub>arsM</sub>*, was PCR amplified with Taq  
795 DNA polymerase (Thermo Fisher Scientific) using the *p<sub>arsM</sub> FW* and *p<sub>arsM</sub> RV*  
796 primers (Table S3). EMSA reactions were set up as previously described (23, 61)  
797 in the presence of 1 µg of poly (dI-dC), 20 ng *p<sub>arsM</sub>* and increasing concentrations  
798 of *TtSmtB* (1, 2, 3, 5 and 10 µM, considering *TtSmtB* as a dimer) using SYBR™  
799 Gold Nucleic Acid Gel Stain for band detection. The EMSA reactions that  
800 simultaneously employed *TtSmtB* and *TtArsM* were set up in identical conditions  
801 using 3 µM of each protein alone or in combination.

802

### 803 **Arsenic tolerance of *E. coli* expressing *TtArsM***

804 The following strains were inoculated in 10 mL of LB pre-cultures, supplemented

805 with kanamycin (50  $\mu\text{g}/\text{mL}$ ) and chloramphenicol (33  $\mu\text{g}/\text{mL}$ ): i) *E. coli* BL21-  
806 CodonPlus (DE3)-RIL: pET30/*TtarsM*, ii) *E. coli* BL21-CodonPlus (DE3)-RIL:  
807 pET30/ *TtarsM C77S*, iii) *E. coli* BL21-CodonPlus (DE3)-RIL: pET30/ *TtarsM*  
808 *H40A*, iv) *E. coli* BL21-CodonPlus (DE3)-RIL: pET30/ *TtarsM H179A* and v) *E.*  
809 *coli* BL21-CodonPlus (DE3)-RIL: pET30 (control). The pre-cultures were  
810 incubated at 37°C for 16 h at 180 rpm. Subsequently, 50 mL LB cultures,  
811 supplemented with antibiotics, were inoculated with the pre-cultures to initial  
812 0.08 OD<sub>600nm</sub> and incubated at 37°C and 180 rpm until 0.6 OD<sub>600nm</sub> (exponential  
813 growth). At that point, protein expression was induced with 1mM IPTG and the  
814 cultures were incubated at 37°C and 180 rpm for 3 additional hours. From these  
815 growing cells, fresh LB cultures were inoculated to 0.05 OD<sub>600nm</sub> and distributed  
816 to 24-well plates (1 mL per well) containing LB medium supplemented with 1  
817 mM IPTG, kanamycin (50  $\mu\text{g}/\text{mL}$ ), chloramphenicol (33  $\mu\text{g}/\text{mL}$ ) and increasing  
818 concentrations of arsenate and arsenite (from 2.5 mM to 7.0 mM). The minimal  
819 inhibitory concentrations (MIC) **endpoint** for each strain were determined as the  
820 lowest concentration of arsenite **at which there was the difference between grown**  
821 **and start culture lower than 0.01 OD<sub>600nm</sub> after 16 hours of incubation at 37°C**  
822 **(22). All the cells up to the MIC value were able to grow if reinoculated in an**  
823 **arsenic-free medium.** The reported values are the average of three biological  
824 replicates.  
825

## 826 **ThermoCas9 editing and targeting constructs**

827 The plasmids used for the ThermoCas9-based targeting and editing experiments  
828 are listed in **Table S4**. The vector pMK18 was used as the template for the  
829 construction of the ThermoCas9-based targeting and editing plasmids and the  
830 employed primers, the DNA templates, and the DNA fragments, which are listed  
831 in **Table S4**. The *thermoCas9* gene was codon harmonized, according to *T.*  
832 *thermophilus* HB27 codon-usage using the Galaxy/Codon harmonizer online tool  
833 (62), and it was synthesized (Twist Bioscience) (Table S5). The DNA fragments  
834 were designed with appropriate overhangs for NEBuilder HiFi DNA assembly  
835 (NEB) and they were obtained through PCR with Q5 Polymerase (NEB). The  
836 PCR products were subjected to 1% agarose gel electrophoresis and they were  
837 purified using a Zymogen gel DNA recovery kit (Zymo Research). The assembly  
838 reactions were transformed to chemically competent *E. coli* DH5 $\alpha$  cells (NEB)  
839 and the cells were plated on LB agar plates supplemented with kanamycin (50  
840  $\mu$ g/mL). Single colonies were inoculated in LB medium supplemented with  
841 kanamycin (50  $\mu$ g/mL) for overnight incubation at 37°C. Plasmid material was  
842 isolated using the GeneJet plasmid miniprep kit (Thermo Fisher Scientific),  
843 sequence verified (GATC-biotech) and 300 ng of each plasmid (pMK-  
844 ThermoCas9-NT/sp1/sp2 and pMK-ThermoCas9-HR-NT/sp1/sp2) was  
845 transformed to either *T. thermophilus* HB27 cells (22), as indicated per  
846 experimental process.

847 The obtained plasmid, pMK-ThermoCas9-NT, was used as the backbone to  
848 construct a new plasmid to obtain the deletion of the *TtarsX* gene (Table S4) and  
849 the insertion of the gene coding **sYFP** (27). The obtained plasmid (pMK-  
850 ThermoCas9-HR-syfp) was used to transform *T. thermophilus* HB27  $\Delta TtarsM$   
851 cells as already described to obtain the strain denoted  $\Delta TtarsM$ - $\Delta TtarsX$  (*syfp*).

852

### 853 **Arsenic tolerance of *T. thermophilus* HB27 wild type and mutant strains**

854 Exponentially growing pre-cultures of *T. thermophilus* HB27 (control), *T.*  
855 *thermophilus* HB27  $\Delta TtarsM$  and *T. thermophilus* HB27  $\Delta TtarsM$ - $\Delta TtarsX$   
856 (*syfp*) were diluted to 0.08 OD<sub>600nm</sub> in 10 mL TM cultures containing increasing  
857 concentrations of arsenite and arsenate (from 0.1 mM to 50 mM). The cultures  
858 were incubated aerobically at 70°C for 18 h and the MIC values were determined  
859 as the lowest concentrations of arsenite and arsenate that completely inhibited the  
860 growth of a strain (22). The reported values are the average of three biological  
861 replicates.

862

### 863 **Bioreporter activity measurement**

864 Overnight cultures of *T. thermophilus* HB27  $\Delta TtarsM$ - $\Delta TtarsX$  (*syfp*) strain were  
865 diluted to 0.08 OD<sub>600nm</sub> in TM medium and then grown aerobically at 70°C until  
866 0.5 OD<sub>600nm</sub>. The cultures were divided into samples of 5 mL each and  
867 subsequently supplemented with increasing concentrations of arsenite and

868 arsenate (0.5  $\mu$ M to 4  $\mu$ M). After 1-hour of incubation at 70°C, 200  $\mu$ L of each  
869 cell sample were removed and centrifuged for 5' at 6000 rpm. The pellets were  
870 washed twice with equal volumes of PBS 1X and resuspended with equal  
871 volumes of PBS 1X before being distributed into a 96-well plate. sYFP  
872 fluorescence intensity of each sample was measured employing a Synergy™  
873 HTX Multi-Mode Microplate Reader (BioTek), using excitation and emission  
874 wavelengths of 458 nm and 540 nm, respectively. The measured fluorescence  
875 intensities were normalized for the optical density of each sample at 600 nm. The  
876 measured fluorescence was reported as fluorescence relative expression,  
877 assuming that the fluorescence value of not treated cells (control) was 1.  
878 Each experiment was performed in three technical and biological replicates.  
879 Statistical analysis was performed using one-way ANOVA; significant  
880 differences are indicated as: \*  $p < 0.05$ , \*\*  $p < 0.01$ , \*\*\*  $p < 0.001$ .

881

## 882 **Acknowledgements**

883 The authors kindly acknowledge Prof. Josè Berenguer from Universidad  
884 Autònoma de Madrid for kindly providing the pMK-Pnqo-syfp vector. Prof.  
885 Lucia Cavalca and Prof. Gian Attilio Sacchi from the University of Milan also  
886 acknowledged for donating disodium methyl arsonate hexahydrate (MMAs)  
887 (ChemService) and dimethylarsinic acid (DMAs) (Merck Life Science S.r.l.).  
888 The authors also acknowledge Prof. Angela Amoresano (Department of



889 **Chemical Sciences, University of Naples Federico II) for helpful discussion.**

890 Acknowledgements go to grant ERA-NET Cofund MarTERA, who funded the  
891 project: "FLAshMoB: Functional Amyloid Chimera for Marine Biosensing".  
892 This project has received funding from the European Research Council (ERC),  
893 under the European Union's Horizon 2020 research and innovation programme,  
894 grant agreement No. 834279, and from the Netherlands Organization for  
895 Scientific Research (NWO, Spinoza grant SPI 93-537) to JvdO.

896

897 **References:**

- 898 1. Mukhopadhyay R, Rosen BP, Phung LT, Silver S. 2002. Microbial  
899 arsenic: From geocycles to genes and enzymes. *FEMS Microbiol Rev.*
- 900 2. Chen Z, Wang Y, Jiang X, Fu D, Xia D, Wang H, Dong G, Li Q. 2017.  
901 Dual roles of AQDS as electron shuttles for microbes and dissolved  
902 organic matter involved in arsenic and iron mobilization in the arsenic-  
903 rich sediment. *Sci Total Environ*  
904 <https://doi.org/10.1016/j.scitotenv.2016.09.006>.
- 905 3. Yang H-C, Rosen BP. 2016. New mechanisms of bacterial arsenic  
906 resistance. *Biomed J* 39:5–13.
- 907 4. Gallo G, Puopolo R, Carbonaro M, Maresca E, Fiorentino G. 2021.  
908 Extremophiles, a Nifty Tool to Face Environmental Pollution: From  
909 Exploitation of Metabolism to Genome Engineering. *Int J Environ Res*

- 910 Public Health 18:5228.
- 911 5. Politi J, Spadavecchia J, Fiorentino G, Antonucci I, Casale S, De Stefano  
912 L. 2015. Interaction of *Thermus thermophilus* ArsC enzyme and gold  
913 nanoparticles naked-eye assays speciation between As(III) and As(V).  
914 Nanotechnology 26:435703.
- 915 6. Politi J, Spadavecchia J, Fiorentino G, Antonucci I, De Stefano L. 2016.  
916 Arsenate reductase from *Thermus thermophilus* conjugated to  
917 polyethylene glycol-stabilized gold nanospheres allow trace sensing and  
918 speciation of arsenic ions. J R Soc Interface 13:20160629.
- 919 7. Rosen BP. 2002. Biochemistry of arsenic detoxification. FEBS Lett  
920 529:86–92.
- 921 8. Liu Z, Rensing C, Rosen BP. 2011. Toxicity: resistance pathways for  
922 metalloids and toxic metals. Encycl Inorg Bioinorg Chem 1–13.
- 923 9. Aulitto M, Gallo G, Puopolo R, Mormone A, Limauro D, Contursi P,  
924 Piochi M, Bartolucci S, Fiorentino G. 2021. Genomic Insight of  
925 *Alicyclobacillus mali* FL18 Isolated From an Arsenic-Rich Hot Spring.  
926 Front Microbiol 12.
- 927 10. Mukhopadhyay R, Rosen BP. 2002. Arsenate reductases in prokaryotes  
928 and eukaryotes. Environ Health Perspect 110:745–748.
- 929 11. Chen C-M, Misra TK, Silver S, Rosen BP. 1986. Nucleotide sequence of  
930 the structural genes for an anion pump. The plasmid-encoded arsenical

- 931 resistance operon. *J Biol Chem* 261:15030–15038.
- 932 12. Wu J, Rosen BP. 1991. The ArsR protein is a trans-acting regulatory  
933 protein. *Mol Microbiol* 5:1331–1336.
- 934 13. Qin J, Rosen BP, Zhang Y, Wang G, Franke S, Rensing C. 2006. Arsenic  
935 detoxification and evolution of trimethylarsine gas by a microbial  
936 arsenite *S*-adenosylmethionine methyltransferase. *Proc Natl Acad Sci*  
937 103:2075–2080.
- 938 14. Chen J, Madegowda M, Bhattacharjee H, Rosen BP. 2015. ArsP: a  
939 methylarsenite efflux permease. *Mol Microbiol* 98:625–635.
- 940 15. Chen S-C, Sun G-X, Yan Y, Konstantinidis KT, Zhang S-Y, Deng Y, Li  
941 X-M, Cui H-L, Musat F, Popp D. 2020. The Great Oxidation Event  
942 expanded the genetic repertoire of arsenic metabolism and cycling. *Proc*  
943 *Natl Acad Sci* 117:10414–10421.
- 944 16. Chen S-C, Sun G-X, Rosen BP, Zhang S-Y, Deng Y, Zhu B-K, Rensing  
945 C, Zhu Y-G. 2017. Recurrent horizontal transfer of arsenite  
946 methyltransferase genes facilitated adaptation of life to arsenic. *Sci Rep*  
947 7:1–11.
- 948 17. Chen J, Rosen BP. 2020. The arsenic methylation cycle: how microbial  
949 communities adapted methylarsenicals for use as weapons in the  
950 continuing war for dominance. *Front Environ Sci*.
- 951 18. Gihring TM, Druschel GK, McCleskey RB, Hamers RJ, Banfield JF.

- 952 2001. Rapid arsenite oxidation by *Thermus aquaticus* and *Thermus*  
953 *thermophilus*: field and laboratory investigations. *Environ Sci Technol*  
954 35:3857–3862.
- 955 19. Saltikov CW, Olson BH. 2002. Homology of *Escherichia coli* R773  
956 *arsA*, *arsB*, and *arsC* genes in arsenic-resistant bacteria isolated from raw  
957 sewage and arsenic-enriched creek waters. *Appl Environ Microbiol*  
958 <https://doi.org/10.1128/AEM.68.1.280-288.2002>.
- 959 20. Qin J, Lehr CR, Yuan C, Le XC, McDermott TR, Rosen BP. 2009.  
960 Biotransformation of arsenic by a Yellowstone thermoacidophilic  
961 eukaryotic alga. *Proc Natl Acad Sci* 106:5213–5217.
- 962 21. Henne A, Brüggemann H, Raasch C, Wiezer A, Hartsch T, Liesegang H,  
963 Johann A, Lienard T, Gohl O, Martinez-Arias R, Jacobi C, Starkuviene  
964 V, Schlenczeck S, Dencker S, Huber R, Klenk HP, Kramer W, Merkl R,  
965 Gottschalk G, Fritz HJ. 2004. The genome sequence of the extreme  
966 thermophile *Thermus thermophilus*. *Nat Biotechnol*  
967 <https://doi.org/10.1038/nbt956>.
- 968 22. Antonucci I, Gallo G, Limauro D, Contursi P, Ribeiro AL, Blesa A,  
969 Berenguer J, Bartolucci S, Fiorentino G. 2017. An *ArsR/SmtB* family  
970 member regulates arsenic resistance genes unusually arranged in  
971 *Thermus thermophilus* HB27. *Microb Biotechnol* 10.
- 972 23. Antonucci I, Gallo G, Limauro D, Contursi P, Ribeiro AL, Blesa A,

- 973 Berenguer J, Bartolucci S, Fiorentino G. 2018. Characterization of a  
974 promiscuous cadmium and arsenic resistance mechanism in *Thermus*  
975 *thermophilus* HB27 and potential application of a novel bioreporter  
976 system. *Microb Cell Fact* 17.
- 977 24. Del Giudice I, Limauro D, Pedone E, Bartolucci S, Fiorentino G. 2013.  
978 A novel arsenate reductase from the bacterium *Thermus thermophilus*  
979 HB27: its role in arsenic detoxification. *Biochim Biophys Acta (BBA)-*  
980 *Proteins Proteomics* 1834:2071–2079.
- 981 25. Puopolo R, Sorrentino I, Gallo G, Piscitelli A, Giardina P, Le Goff A,  
982 Fiorentino G. 2021. Self-assembling thermostable chimeras as new  
983 platform for arsenic biosensing. *Sci Rep* 11:2991.
- 984 26. Busenlehner LS, Pennella MA, Giedroc DP. 2003. The SmtB/ArsR  
985 family of metalloregulatory transcriptional repressors: structural insights  
986 into prokaryotic metal resistance. *FEMS Microbiol Rev* 27:131–143.
- 987 27. Blesa A, Berenguer J. 2015. Contribution of vesicle-protected  
988 extracellular DNA to horizontal gene transfer in *Thermus* spp. *Int*  
989 *Microbiol* 18:177–187.
- 990 28. Carpentieri A, Gamberi T, Modesti A, Amoresano A, Colombini B,  
991 Nocella M, Bagni MA, Fiaschi T, Barolo L, Gulisano M. 2016. Profiling  
992 carbonylated proteins in heart and skeletal muscle mitochondria from  
993 trained and untrained mice. *J Proteome Res* 15:3666–3678.

- 994 29. Rao ST, Rossmann MG. 1973. Comparison of super-secondary  
995 structures in proteins. *J Mol Biol* 76:241–256.
- 996 30. Schubert HL, Blumenthal RM, Cheng X. 2003. Many paths to  
997 methyltransfer: a chronicle of convergence. *Trends Biochem Sci* 28:329–  
998 335.
- 999 31. Huang K, Xu Y, Packianathan C, Gao F, Chen C, Zhang J, Shen Q,  
1000 Rosen BP, Zhao F. 2018. Arsenic methylation by a novel ArsM As (III)  
1001 S-adenosylmethionine methyltransferase that requires only two  
1002 conserved cysteine residues. *Mol Microbiol* 107:265–276.
- 1003 32. Gallo G, Antonucci I, Pirone L, Amoresano A, Contursi P, Limauro D,  
1004 Pedone E, Bartolucci S, Fiorentino G. 2019. A physicochemical  
1005 investigation on the metal binding properties of TtSmtB, a thermophilic  
1006 member of the ArsR/SmtB transcription factor family. *Int J Biol*  
1007 *Macromol* 138.
- 1008 33. Singh J, Vijay S, Mansuri R, Rawal R, Kadian K, Sahoo GC, Kumar M,  
1009 Sharma A. 2019. Computational and experimental elucidation of  
1010 *Plasmodium falciparum* phosphoethanolamine methyltransferase  
1011 inhibitors: Pivotal drug target. *PLoS One* 14:e0221032.
- 1012 34. Patil NA, Basu B, Deobagkar DD, Apte SK, Deobagkar DN. 2017.  
1013 Putative DNA modification methylase DR\_C0020 of *Deinococcus*  
1014 *radiodurans* is an atypical SAM dependent C-5 cytosine DNA methylase.

- 1015 Biochim Biophys Acta (BBA)-General Subj 1861:593–602.
- 1016 35. Dou L, Yan F, Pang J, Zheng D, Li D, Gao L, Wang L, Xu Y, Shi J,  
1017 Wang Q. 2019. Protein lysine 43 methylation by EZH1 promotes AML1-  
1018 ETO transcriptional repression in leukemia. *Nat Commun* 10:1–15.
- 1019 36. Zhang J, Cao T, Tang Z, Shen Q, Rosen BP, Zhao F-J. 2015. Arsenic  
1020 methylation and volatilization by arsenite S-adenosylmethionine  
1021 methyltransferase in *Pseudomonas alcaligenes* NBRC14159. *Appl*  
1022 *Environ Microbiol* 81:2852–2860.
- 1023 37. Wang P-P, Sun G-X, Zhu Y-G. 2014. Identification and characterization  
1024 of arsenite methyltransferase from an archaeon, *Methanosarcina*  
1025 *acetivorans* C2A. *Environ Sci Technol* 48:12706–12713.
- 1026 38. Aulitto M, Fusco S, Fiorentino G, Limauro D, Pedone E, Bartolucci S,  
1027 Contursi P. 2017. *Thermus thermophilus* as source of thermozymes for  
1028 biotechnological applications: homologous expression and biochemical  
1029 characterization of an  $\alpha$ -galactosidase. *Microb Cell Fact* 16:1–10.
- 1030 39. Osman D, Cavet JS. 2010. Bacterial metal-sensing proteins exemplified  
1031 by ArsR–SmtB family repressors. *Nat Prod Rep* 27:668–680.
- 1032 40. Tanous C, Soutourina O, Raynal B, Hullo M-F, Mervelet P, Gilles A-M,  
1033 Noirot P, Danchin A, England P, Martin-Verstraete I. 2008. The CymR  
1034 regulator in complex with the enzyme CysK controls cysteine  
1035 metabolism in *Bacillus subtilis*. *J Biol Chem* 283:35551–35560.

- 1036 41. Fisher SH, Wray L V. 2008. *Bacillus subtilis* glutamine synthetase  
1037 regulates its own synthesis by acting as a chaperone to stabilize GlnR-  
1038 DNA complexes. *PNAS* 1014–1019.
- 1039 42. Cava F, Laptenko O, Borukhov S, Chahlafl Z, Blas-Galindo E, Gómez-  
1040 Puertas P, Berenguer J. 2007. Control of the respiratory metabolism of  
1041 *Thermus thermophilus* by the nitrate respiration conjugative element  
1042 NCE. *Mol Microbiol* 64:630–646.
- 1043 43. Mougiakos I, Mohanraju P, Bosma EF, Vrouwe V, Bou MF, Naduthodi  
1044 MIS, Gussak A, Brinkman RBL, Van Kranenburg R, Van Der Oost J.  
1045 2017. Characterizing a thermostable Cas9 for bacterial genome editing  
1046 and silencing. *Nat Commun* 8:1–11.
- 1047 44. Blesa A, Baquedano I, Quintáns NG, Mata CP, Castón JR, Berenguer J.  
1048 2017. The transjugation machinery of *Thermus thermophilus*:  
1049 Identification of TdtA, an ATPase involved in DNA donation. *PLoS*  
1050 *Genet* 13:e1006669.
- 1051 45. Roy R, Samanta S, Patra S, Mahato NK, Saha RP. 2018. In silico  
1052 identification and characterization of sensory motifs in the transcriptional  
1053 regulators of the ArsR-SmtB family. *Metallomics* 10:1476–1500.
- 1054 46. Ajees AA, Marapakala K, Packianathan C, Sankaran B, Rosen BP. 2012.  
1055 Structure of an As (III) S-adenosylmethionine methyltransferase: insights  
1056 into the mechanism of arsenic biotransformation. *Biochemistry* 51:5476–



- 1057 5485.
- 1058 47. Dheeman DS, Packianathan C, Pillai JK, Rosen BP. 2014. Pathway of  
1059 human AS3MT arsenic methylation. *Chem Res Toxicol* 27:1979–1989.
- 1060 48. Fusco S, Aulitto M, Iacobucci I, Crocamo G, Pucci P, Bartolucci S,  
1061 Monti M, Contursi P. 2020. The interaction between the F55 virus-  
1062 encoded transcription regulator and the RadA host recombinase reveals a  
1063 common strategy in Archaea and Bacteria to sense the UV-induced  
1064 damage to the host DNA. *Biochim Biophys Acta - Gene Regul Mech*  
1065 1863.
- 1066 49. Le Y, Fu Y, Sun J. 2020. Genome editing of the anaerobic thermophile  
1067 *Thermoanaerobacter ethanolicus* using thermostable Cas9. *Appl Environ*  
1068 *Microbiol* 87:e01773-20.
- 1069 50. Adalsteinsson BT, Kristjansdottir T, Merre W, Helleux A, Dusaucy J,  
1070 Tourigny M, Fridjonsson O, Hreggvidsson GO. 2021. Efficient genome  
1071 editing of an extreme thermophile, *Thermus thermophilus*, using a  
1072 thermostable Cas9 variant. *Sci Rep* 11:1–15.
- 1073 51. Monti M, Orru S, Pagnozzi D, Pucci P. 2005. Functional proteomics.  
1074 *Clin Chim acta* 357:140–150.
- 1075 52. Kumar S, Stecher G, Li M, Knyaz C, Tamura K. 2018. MEGA X:  
1076 molecular evolutionary genetics analysis across computing platforms.  
1077 *Mol Biol Evol* 35:1547–1549.

- 1078 53. Wang P-P, Bao P, Sun G-X. 2015. Identification and catalytic residues of  
1079 the arsenite methyltransferase from a sulfate-reducing bacterium,  
1080 *Clostridium* sp. BXM. *FEMS Microbiol Lett* 362:1–8.
- 1081 54. Wang G, Kennedy SP, Fasiludeen S, Rensing C, DasSarma S. 2004.  
1082 Arsenic resistance in *Halobacterium* sp. strain NRC-1 examined by using  
1083 an improved gene knockout system. *J Bacteriol* 186:3187–3194.
- 1084 55. Sievers F, Wilm A, Dineen D, Gibson TJ, Karplus K, Li W, Lopez R,  
1085 McWilliam H, Remmert M, Söding J. 2011. Fast, scalable generation of  
1086 high-quality protein multiple sequence alignments using Clustal Omega.  
1087 *Mol Syst Biol* 7:539.
- 1088 56. Zhang Y. 2008. I-TASSER server for protein 3D structure prediction.  
1089 *BMC Bioinformatics* 9:40.
- 1090 57. HeeShin W. 2014. Prediction of protein structure and interaction by  
1091 GALAXY protein modeling programs. *Biodesign* 2:1–11.
- 1092 58. Macindoe G, Mavridis L, Venkatraman V, Devignes M-D, Ritchie DW.  
1093 2010. HexServer: an FFT-based protein docking server powered by  
1094 graphics processors. *Nucleic Acids Res* 38:W445–W449.
- 1095 59. Stein SE. 1994. Estimating probabilities of correct identification from  
1096 results of mass spectral library searches. *J Am Soc Mass Spectrom*  
1097 5:316–323.
- 1098 60. Fiorentino G, Ronca R, Cannio R, Rossi M, Bartolucci S. 2007. MarR-

- 1099           like transcriptional regulator involved in detoxification of aromatic  
1100           compounds in *Sulfolobus solfataricus*. *J Bacteriol* 189:7351–7360.
- 1101   61.   Fiorentino G, Del Giudice I, Bartolucci S, Durante L, Martino L, Del  
1102           Vecchio P. 2011. Identification and physicochemical characterization of  
1103           BldR2 from *Sulfolobus solfataricus*, a novel archaeal member of the  
1104           MarR transcription factor family. *Biochemistry* 50:6607–6621.
- 1105   62.   Claassens NJ, Siliakus MF, Spaans SK, Creutzburg SCA, Nijse B,  
1106           Schaap PJ, Quax TEF, Van Der Oost J. 2017. Improving heterologous  
1107           membrane protein production in *Escherichia coli* by combining  
1108           transcriptional tuning and codon usage algorithms. *PLoS One*  
1109           12:e0184355.
- 1110

1111 **Figure captions:**

1112 **Fig. 1 A) Phylogenetic tree of archaeal and bacterial arsenite**  
1113 **methyltransferases, SAM-dependent methyltransferases and**  
1114 **methyltransferase domain containing proteins.** The aminoacidic sequences  
1115 used for the construction of the phylogenetic tree are: *TtArsM* from *T.*  
1116 *thermophilus* HB27; SAM-dependent methyltransferase from five members of  
1117 the *Thermus* genus (*islandicus*, *caldilimi*, *antranikianii*, *oshimai* and *brockianus*),  
1118 *Anaerolineae* bacterium and *Mesorhizobium amorphae*; arsenite  
1119 methyltransferase from *Clostridium* sp BMX (53), *Methanosarcina acetivorans*,  
1120 *Rhodopseudomonas palustris* (13), *Pseudomonas alcaligenes* (36)  
1121 *Halobacterium salinarum* (54) *Cyanidioschyzon merolae* (45) and a  
1122 methyltransferase domain-containing protein from *Sanguinobacter* sp.

1123 **B) Multiple sequence alignment of hypothetical and functionally**  
1124 **characterized arsenite methyltransferases (ArsM) with *T. thermophilus***  
1125 **HB27 *TtArsM*.** The partial alignment includes 5 members of the *Thermus* genus  
1126 (*islandicus*, *caldilimi*, *antranikianii*, *oshimai* and *brockianus*) (98% identity to  
1127 *TtArsM*, sequence aligned from amino acid 40 to 89), *Clostridium* sp BMX (53)  
1128 (28% identity to *TtArsM*, from 22 to 193), *R. palustris* (13) (32% identity to  
1129 *TtArsM*, from 23 to 168), *M. acetivorans* (37) (29% identity to *TtArsM*, from 19  
1130 to 190), *P. alcaligenes* (36) (31% identity to *TtArsM*, from 149 to 320),  
1131 *Cyanidioschyzon merolae* (45) (27.7% identity to *TtArsM*, from 29 to 214) and

1132 *H. salinarum* (54) (25% identity to *TtArsM*, from 58 to 294). Red arrow indicates  
1133 the catalytic cysteine, conserved in characterized *ArsM* and *TtArsM*; green  
1134 arrows indicate two catalytic cysteines conserved in characterized *ArsM*, but not  
1135 in *TtArsM*; blue arrow indicates the conserved aspartic acid; the SAM binding  
1136 domain, which is part of the typical Rossman fold, is underlined in blue. The two  
1137 histidines of *TtArsM* predicted to interact with arsenite are indicated by black  
1138 arrows.

1139 **Fig. 2 *In vitro* assessment of methyltransferase activity. A) Arsenite**  
1140 **methylation assays.** The enzyme coupled colorimetric assay was carried out in  
1141 continuous in the presence of 3.1  $\mu\text{M}$  of recombinant *TtArsM* (black curve) or  
1142 *TtArsM C77S* (red curve), 800  $\mu\text{M}$  SAM and 200  $\mu\text{M}$  As(III) at 50°C. The  
1143 absorbance of the reaction mixture was recorded every minute for a total of 1  
1144 hour. The graph represents the average of three independent experiments, each  
1145 performed in triplicate. **B) Products of As(III) methylation by purified**  
1146 ***TtArsM*.** Arsenic species were analyzed by GC-MS. Each assay contained 10  
1147  $\mu\text{M}$  *TtArsM*, 250  $\mu\text{M}$  As(III), 6 mM GSH and 1 mM SAM, incubated at 65°C  
1148 for 24 h. In **B)** and **C)**, the chromatograms recorded between 2 and 6 min for  
1149 negative control and the enzyme mixture. **D** and **E** report the fragmentation  
1150 spectra for MMAs and DMAs.

1151 **Fig. 3 *TtSmtB:TtArsM* interaction in the presence of heavy metal ions.** CoIp  
1152 of *TtSmtB:TtArsM* complex with increasing concentrations of (A) arsenate, (B)  
1153 arsenite, (C) cadmium and (D) antimony. Complexes were immunoprecipitated  
1154 with anti-*TtSmtB* antibodies and revealed through Western-blot using anti-His  
1155 antibodies against the His-tag of *TtArsM*. Below: densitometric analysis of blots  
1156 of *TtSmtB:TtArsM* complex. The intensity of the unchallenged complex was  
1157 used as a reference. Average values from three biological replicates are shown,  
1158 with error bars representing standard deviations. Statistical analysis was  
1159 performed using one-way ANOVA; significant differences are indicated as: \* p  
1160 < 0.05, \*\* p < 0.01, \*\*\* p < 0.001, \*\*\*\* p < 0.0001.

1161 **Fig. 4 *TtSmtB:p<sub>arsM</sub>* interaction.** (A) Interaction of *p<sub>arsM</sub>* in the presence of  
1162 increasing concentration of *TtSmtB*. Lane 1: negative control; Lane 2: 1  $\mu$ M  
1163 *TtSmtB*; Lane 3: 2  $\mu$ M *TtSmtB*; Lane 4: 3  $\mu$ M *TtSmtB*; Lane 5: 5  $\mu$ M *TtSmtB*;  
1164 Lane 6: 10  $\mu$ M *TtSmtB*. (B) EMSA with *p<sub>arsM</sub>*, in presence of 3  $\mu$ M *TtSmtB* and  
1165 3  $\mu$ M *TtArsM*.

1166 **Fig. 5 Growth of *E. coli* BL21 strains expressing *TtArsM* and its mutants, in**  
1167 **the presence of different arsenite concentrations, measured 24 hours post-**  
1168 **inoculation.** The strains are: *E. coli* BL21/pET30b (black), *E. coli*  
1169 BL21/pET30/*TtarsM* (red), *E. coli* BL21/pET30/ *TtarsM* H40A (green), *E. coli*  
1170 BL21/pET30/*TtarsM* H179A (blue) and *E. coli* BL21/pET30/*TtarsM* C77S

1171 (orange). Average values from three biological replicates are shown, with error  
1172 bars representing standard deviations.

1173 **Fig. 6 ThermoCas9-based genome engineering in *T. thermophilus* HB27.**

1174 **A)** pMK-ThermoCas9-sp1/2/NT targeting vectors. **B)** Graphical representation

1175 of the ThermoCas9 targeting assay results (CFUs), for assessing the ThermoCas9

1176 toxicity and targeting efficiency in *T. thermophilus* HB27. Average values from

1177 three biological replicates are shown, with error bars representing standard

1178 deviations. **C)** pMK-ThermoCas9-HR-sp1/2 editing vectors, employed for the

1179 genomic deletion of the *TtarsM* gene. **D)** Agarose gel electrophoresis showing

1180 the resulting products from genome-specific colony PCRs on *T. thermophilus*

1181 colonies formed from the ThermoCas9-based *TtarsM* deletion process. A wild

1182 type colony was subjected to the same PCR and the related product is shown here

1183 as negative control for *TtarsM* deletion. The expected sizes of the PCR

1184 amplification products that correspond to the wild type and  $\Delta TtarsM$  genotypes

1185 are indicated with black arrows.

1186 **Fig. 7** Growth of *T. thermophilus* HB27 (black), *T. thermophilus* HB27  $\Delta TtarsM$

1187 (red) and *T. thermophilus* HB27  $\Delta TtarsM$ - $\Delta TtarsX$  (*syfp*) (blue) in TM medium

1188 in the presence of different concentrations of **A)** arsenite and **B)** arsenate

1189 measured 24 hours after inoculation. Average values from three biological

1190 replicates are shown, with error bars representing standard deviations.

1191 **Fig. 8 Bioreporter activity.** *T. thermophilus* HB27  $\Delta TtarsM$ - $\Delta TtarsX$  (*syfp*)  
1192 bioreporter strain challenged with increasing concentrations of **A)** arsenite and  
1193 **B)** arsenate. Average values from three biological replicates are shown, with error  
1194 bars representing standard deviations. Statistical analysis was performed using  
1195 one-way ANOVA; significant differences are indicated as: \*  $p < 0.05$ , \*\*  $p <$   
1196  $0.01$ , \*\*\*  $p < 0.001$ , \*\*\*\*  $p < 0.0001$ .



1197 **Supplemental Tables:**

1198 **TABLE S1.** List of *TtSmtB* cytosolic interactors.

1199 **TABLE S2.** Results from genome-specific colony PCRs on *T. thermophilus*  
1200 HB27 colonies formed from the ThermoCas9-based *TtarsM* deletion  
1201 experiments.

1202 **TABLE S3.** List of the primers used in this work.

1203 **TABLE S4.** List of the PCR products used for the HiFi assembly reactions to  
1204 construct the ThermoCas9-based targeting and editing plasmids. The primers and  
1205 templates used for the PCR reactions are also included in this list.

1206 **TABLE S5.** The sequence of the synthesized *thermoCas9* gene, which is codon-  
1207 harmonized according to the codon usage of *T. thermophilus* HB27.

1208 **Supplemental Figure captions:**

1209 **Fig. S1 TTC0109 3D model (wild type and mutants) and docking with**  
1210 **arsenite and SAM** (the arsenic atom is the purple sphere, the oxygen atoms are  
1211 the red spheres, SAM is orange). The H40 and H179 residues coordinating  
1212 arsenite are coloured blue. The C77 residue is coloured black; **B)** TTC0109  
1213 C77S; **C)** TTC0109 H40A; **D)** TTC0109 H179A, blue the mutated position.

1214 **Fig. S2 Purification of recombinant *TtArsM*.** **A)** SDS-PAGE analysis Lane M,  
1215 protein marker. Lane NI, protein extract from non-induced cells. Lane I, protein  
1216 extract from induced cells. Lane P, pure protein after His-trap chromatography.  
1217 **B)** Size exclusion chromatogram of *TtArsM*; in the box the calibration curve. The  
1218 chromatogram shows a peak corresponding to the *TtArsM* dimeric form. **C)**  
1219 **Histograms represented the average peak areas for MMAs and DMAs in *TtArsM***  
1220 **enzymatic reaction sample. These peak area values correspond to a concentration**  
1221 **lower than the LOQ assessed to 1 mg/L by using standard molecules. The CV%**  
1222 **values obtained were lower than 15 %.**

1223 **Fig. S3 Purification of recombinant *TtArsM* mutants.** SDS-analysis. Lane M,  
1224 protein marker. Lane NI, protein extract from non-induced cells. Lane I, protein  
1225 extract from induced cells. Lane W, unbound proteins after His-trap  
1226 chromatography. Lane P, pure protein after His-trap chromatography. **A)**  
1227 **Recombinant *TtArsM* C77S. B)** **Recombinant *TtArsM* H40A. C)** **Recombinant**  
1228 ***TtArsM* H179A.**

1229 **Fig. S4** Agarose gel electrophoresis from genome-specific colony PCRs on *T.*  
1230 *thermophilus* HB27 colonies formed from the ThermoCas9-based *TtarsM*  
1231 deletion process upon transformation with **A)** the pMK-ThermoCas9-HR-NT  
1232 control-editing vector, **B)** the pMK-ThermoCas9-HR-sp1 editing vector, and **C)**  
1233 the pMK-ThermoCas9-HR-sp2 editing vector. Wild type colonies were subjected  
1234 to the same PCR and the related products are shown as negative controls for  
1235 *TtarsM* deletion. The expected sizes of the PCR amplification products that  
1236 correspond to the wild type and  $\Delta TtarsM$  genotypes are indicated with arrows.  
1237 **D)** Sequencing chromatogram of the PCR amplified *TtarsM* genomic region from  
1238 a randomly selected colony, previously PCR screened as  $\Delta TtarsM$ . **E)** Agarose  
1239 gel electrophoresis after the curing process of the editing vectors shows the  
1240 absence of products using pMK18-specific primers for colony PCRs on *T.*  
1241 *thermophilus* HB27  $\Delta TtarsM$  colonies. A wild type colony containing the  
1242 pMK18 vector was subjected to the same PCR and the related product is shown  
1243 here as a negative control of the curing process.

1244 **Fig. S5** Agarose gel electrophoresis showing the resulting products from  
1245 genome-specific colony PCRs on *T. thermophilus* HB27  $\Delta TtarsM$ - $\Delta TtarsX$   
1246 (*syfp*) colonies formed from the ThermoCas9-based substitution process of the  
1247 *TtarsX* gene by the *syfp* gene. A wild type colony was subjected to the same PCR  
1248 and the related product is shown as a negative control for *TtarsX* substitution.  
1249 The expected sizes of the PCR amplification products that correspond to the wild

1250 type and  $\Delta TtarsX$  (*syfp*) genotypes are indicated with black arrows. Eight out of  
1251 the ten screened clones were *T. thermophilus*  $\Delta TtarsM$ - $\Delta TtarsX$  (*syfp*) knock-in  
1252 mutants.

**Fig. 1****A**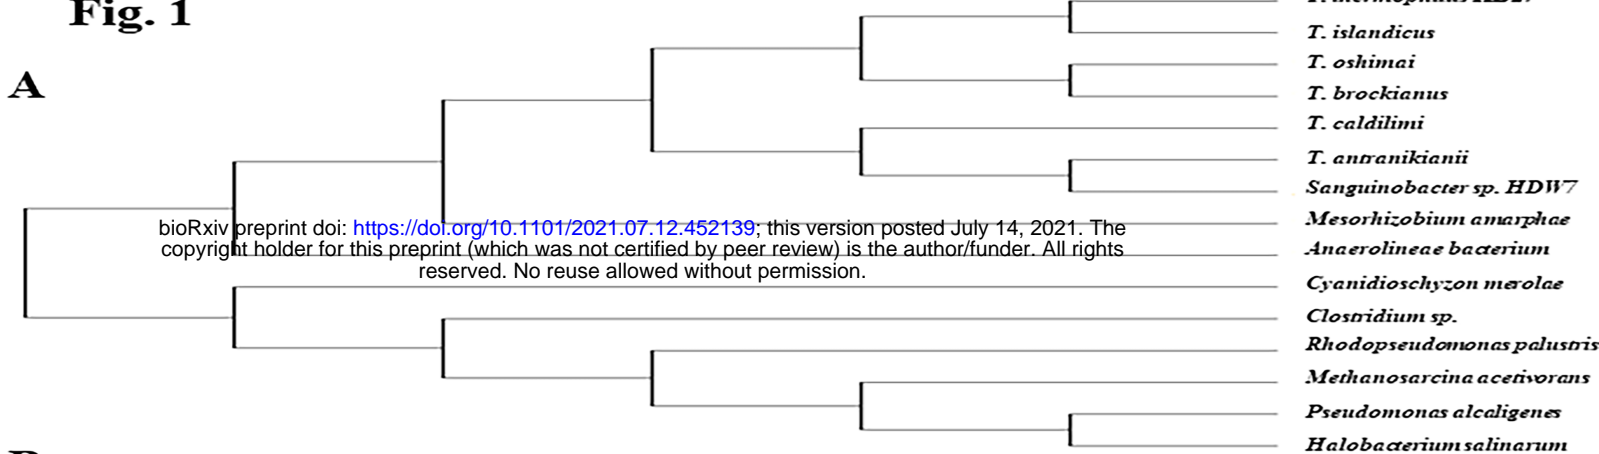**B**

|                                   |                                                                   |     |
|-----------------------------------|-------------------------------------------------------------------|-----|
| <i>T. thermophilus</i> HB27       | HSEVSGK - - - EEEVFLTLQRAFQKAAEEGALVMWALLTNACEAGDPFRKEERL         | 89  |
| <i>T. oshimai</i>                 | HTELWGE - - - AEAVFRALRAAYEEAAGEGALVLWALLTNACEAQDPFRRPDRL         | 88  |
| <i>T. islandicus</i>              | HSELWGG - - - EEEVFRALKEAFARGAEEGALVMWALLTNACEAGDPFRKEDRL         | 89  |
| <i>T. caldilimi</i>               | HSEVSGE - - - EGAVFQALQAAYLAAAEEGATVMWALLTNACEARDPFRSPERI         | 89  |
| <i>T. brockianus</i>              | HTELSGE - - - EAVVFGALREAFKAAEEGALVMWALLTNACEAQDPFRLPERL          | 89  |
| <i>T. antranikianii</i>           | HTELSGE - - - EEAVFRAL EAAFKAAAMEGATVMWALLTNACEAKDPFRRPERL        | 89  |
| <i>Rhodopseudomonas palustris</i> | - - - - - GASPITSNL - YDAAQEQLPAEAMLASLGCG - - - - - NPTAL        | 72  |
| <i>Pseudomonas alcaligenes</i>    | DGGCCSD - - - ETEASGSERLGYDADDVASVADG - ADLGLGCG - - - - - NPKAF  | 198 |
| <i>Methanosarcina acetivorans</i> | GGGCCGD - - - LSAADLSRSLGYSEADVQAVPD - - ANLGLGCG - - - - - NPTAF | 68  |
| <i>Halobacterium salinarum</i>    | DGGCCSD - - - ETEASGSERLGYDADDVASVADG - ADLGLGCG - - - - - NPKAF  | 198 |
| <i>Cyanidioschyzon merolae</i>    | - - - - - KLAAAVPESH - - - RKILADIADEVLEKFYGC - - - - - STLPA     | 78  |
| <i>Clostridium</i> sp.            | SPGCCSDGLSDAADPITGNL - YDESDLQGLDPELIANSFGCG - - - - - NPTAL      | 71  |
| <i>T. thermophilus</i> HB27       | RRFPPGEIARKALEGLKAKSVLDIGTG - - - - VF AEAF AALGLFVVGLDPRA        | 138 |
| <i>T. oshimai</i>                 | RRFNPLGVARKALEGLEAKSVLDIGTG - - - - VF AEAF QELGLFTVGLDPRA        | 137 |
| <i>T. islandicus</i>              | RRFPPLEIARKALEGLKAKSALDIGTG - - - - VF AEAF AQMGLFTVGLDPRA        | 138 |
| <i>T. caldilimi</i>               | KRFPPSEITRKALEGLGARSALDIGTG - - - - VF AEAF AR LGLFTVGVDPRA       | 138 |
| <i>T. brockianus</i>              | ERFAPLEVARRALEGLKAKSALDIGTG - - - - VF AEAF HGLGLFTVGLDPRA        | 138 |
| <i>T. antranikianii</i>           | KRFPPPLA IARKALEGLKAQSVLDIGTG - - - - VF AEAF ASLGLFTVGVDPRA      | 138 |
| <i>Rhodopseudomonas palustris</i> | AQLSPGET - - - - - VLDLGS GGGIDVLLSARRVGP TGKAY - GLDMTD          | 112 |
| <i>Pseudomonas alcaligenes</i>    | AAMAPGET - - - - - VLDLGS GAGFDCFLAAQEVGPDGHVI - GVDMTD           | 238 |
| <i>Methanosarcina acetivorans</i> | AELKPGDI - - - - - VLDLGS GAGFDSFLAAQRVGS LGKVI - GVDMTQ          | 108 |
| <i>Halobacterium salinarum</i>    | AAMAPGET - - - - - VLDLGS GAGFDCFLAAQEVGPDGHVI - GVDMTD           | 238 |
| <i>Cyanidioschyzon merolae</i>    | DGSLEGAT - - - - - VLDLGS CGTGRDVYLASKLVGEHGKVI - GVDMLD          | 118 |
| <i>Clostridium</i> sp.            | MNLNLGEV - - - - - VLDLGS GSGLDVLLSAKR VGP TGKAY - GLDMTD         | 111 |
| <i>T. thermophilus</i> HB27       | DRLEVARAKVK - - - - - GARFVEGRAEALP - - - - - FPDGSFDLAF          | 172 |
| <i>T. oshimai</i>                 | DRLEVARAKVP - - - - - GARFVEGRAEALP - - - - - FPDGSFDLAF          | 171 |
| <i>T. islandicus</i>              | DRLEVARSRVQ - - - - - GARFVEGRAEALP - - - - - FPDGSFDLAF          | 172 |
| <i>T. caldilimi</i>               | DRLEVARAKVK - - - - - KAHFLEAHGENLP - - - - - FPAQSFDLAF          | 172 |
| <i>T. brockianus</i>              | DRLEMARAKVK - - - - - GARFVEGRAESLP - - - - - FPDGSFDLAF          | 172 |
| <i>T. antranikianii</i>           | DRLEVARAKVK - - - - - KARFLEARGESLP - - - - - FPDQSFDLAF          | 172 |
| <i>Rhodopseudomonas palustris</i> | EMLALARDNQR - - - - - KAGLDNVEFLKGEIEAIP - - - - - LPDHSVDV I I   | 151 |
| <i>Pseudomonas alcaligenes</i>    | EMISKARENVA - - - - - KNDAENVEFRLGEIGHLP - - - - - VADES VNVV I   | 277 |
| <i>Methanosarcina acetivorans</i> | EMVKKAQDNAR - - - - - KYGYSNVEFRQGDIEALP - - - - - LDDRSVDV I I   | 147 |
| <i>Halobacterium salinarum</i>    | EMISKARENVA - - - - - KNDAENVEFRLGEIGHLP - - - - - VADES VNVV I   | 277 |
| <i>Cyanidioschyzon merolae</i>    | NQLEVARKYVEYHAEKFFGSPSRSNVRFLKGF IENLATAEPEGVDPDSSVD I V I        | 171 |
| <i>Clostridium</i> sp.            | EMLAVAKENQR - - - - - KSGIENAEFLKGHIEEIP - - - - - LAAKSIDV I I   | 150 |
| <i>T. thermophilus</i> HB27       | FGLALH - - - - - HLDVPALREASRVARRVAVLEWPYREE - - - - -            | 206 |
| <i>T. oshimai</i>                 | FGLALH - - - - - HLDPIPALREAAARVARRVAVLEWPYREE - - - - -          | 205 |
| <i>T. islandicus</i>              | FGLSLH - - - - - HLDAEKALKEAARVARRVAVLEWPYREE - - - - -           | 206 |
| <i>T. caldilimi</i>               | FGLSLH - - - - - HLDPIPALREAAARVARRVVLEWPF RQE - - - - -          | 206 |
| <i>T. brockianus</i>              | FGLSLH - - - - - HLDPIPALKEAARVARRVAVLEWPYREE - - - - -           | 206 |
| <i>T. antranikianii</i>           | FGLSLH - - - - - HLDPIPALREAAARVARRVAVLEWPF RQEVALPEGQTDLR        | 217 |
| <i>Rhodopseudomonas palustris</i> | SNCVINLSGDKDRVLREAFRVLKPGGRFAVSDVVT RGEIPEAL - - - - -            | 194 |
| <i>Pseudomonas alcaligenes</i>    | SNCVVNLAPEKQRVFD DTYRVL RPPGGRVA I SDVVQTAPFPDDV - - - - -        | 320 |
| <i>Methanosarcina acetivorans</i> | SNCVINLAPDKEKVFREAFRVLKPGGRMYVSDMVLLEDLPEDL - - - - -             | 190 |
| <i>Halobacterium salinarum</i>    | SNCVVNLAPEKQRVFD DTYRVL RPPGGRVA I SDVVQTAPFPDDV - - - - -        | 320 |
| <i>Cyanidioschyzon merolae</i>    | SNCVCNLS TNKLALFKEIHRVLRDGGELYFS DVYADRR LSEAA - - - - -          | 214 |
| <i>Clostridium</i> sp.            | SNCVINLSGDKDKVLKEAYRVLKPPGGRFAVSD I V I KRPLPEKI - - - - -        | 193 |

Fig. 2

A

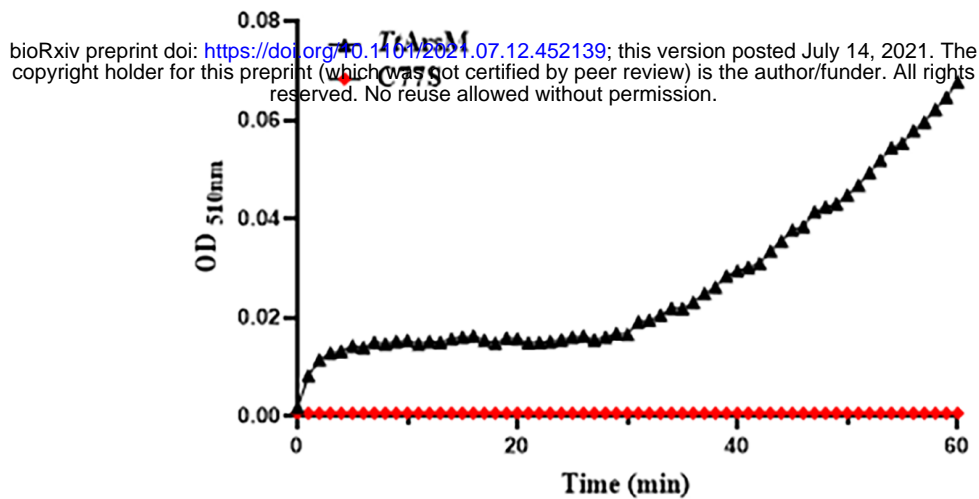

B

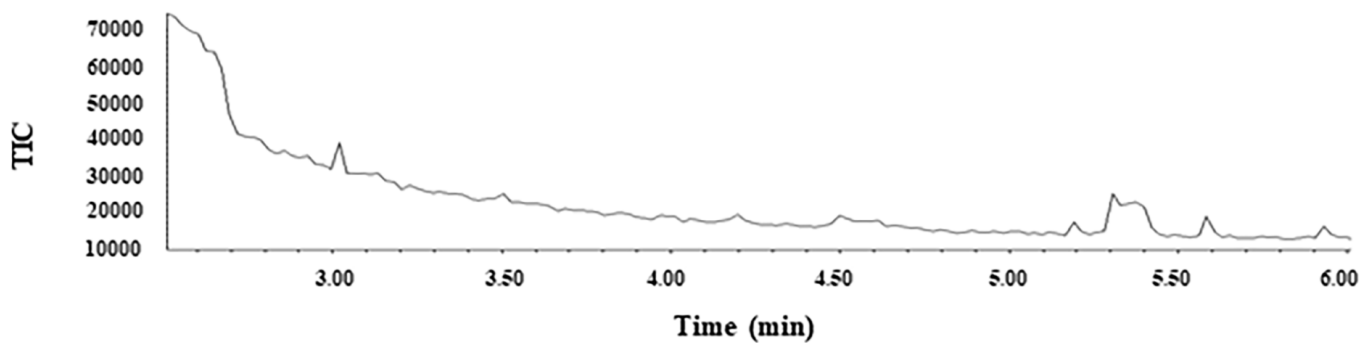

C

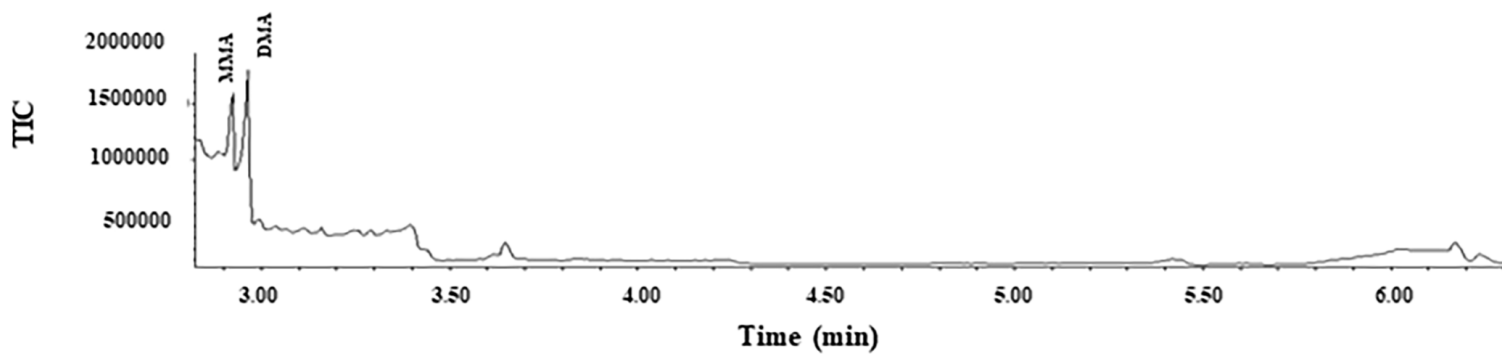

D

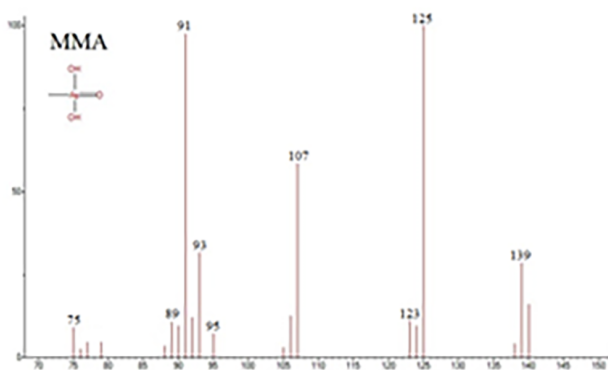

E

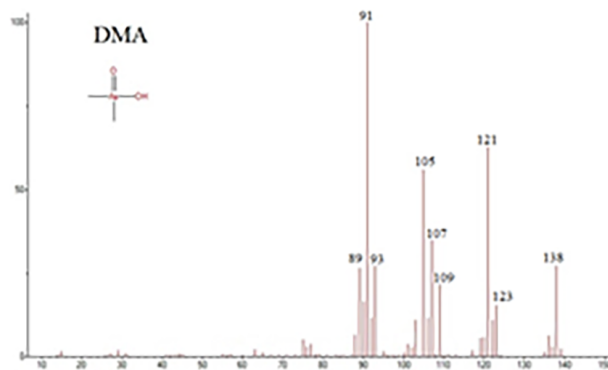

**Fig. 3****A**

As(V) 0 1:25 1:50 1:100

*TtArsM*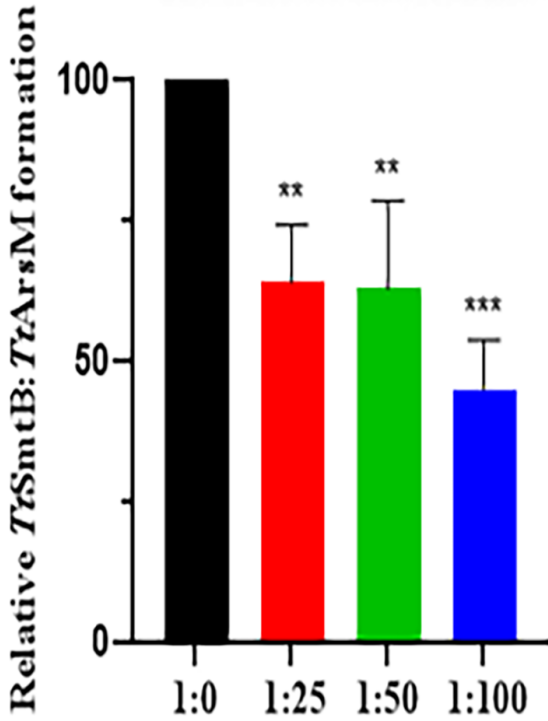**B**

As(III) 0 1:25 1:50 1:100

*TtArsM*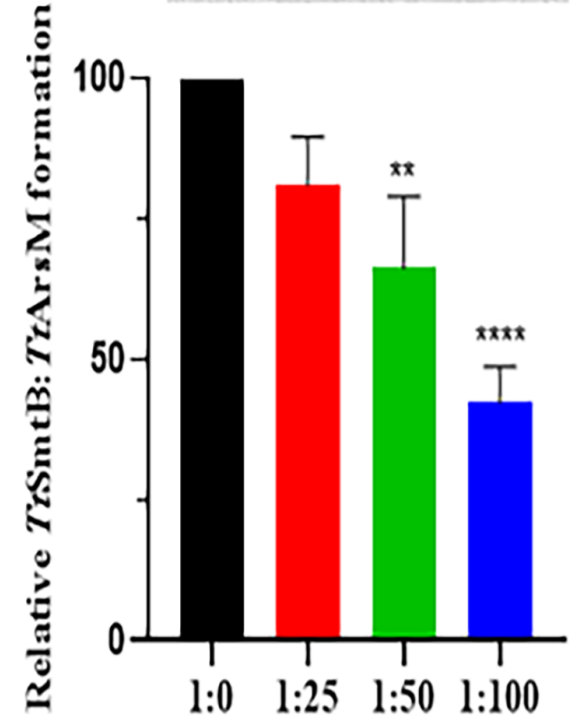

bioRxiv preprint doi: <https://doi.org/10.1101/2021.07.12.452139>; this version posted July 14, 2021. The copyright holder for this preprint (which was not certified by peer review) is the author/funder. All rights reserved. No reuse allowed without permission.

**C**

Cd(II) 0 1:25 1:50 1:100

*TtArsM*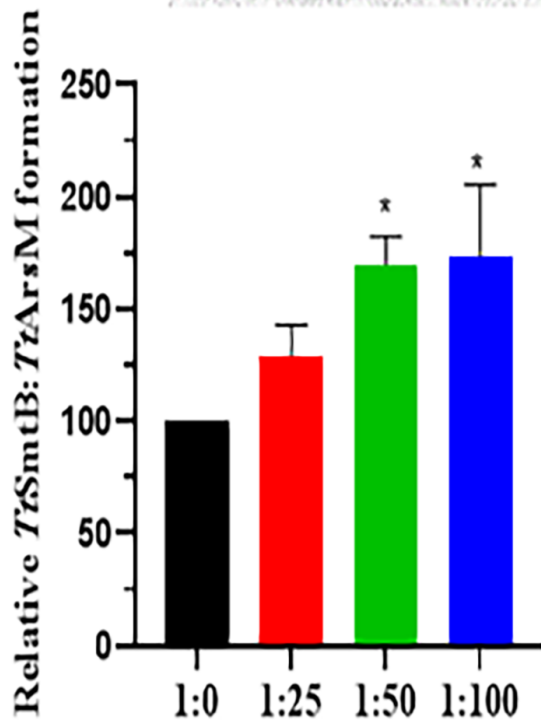**D**

Sb(III) 0 1:25 1:50 1:100

*TtArsM*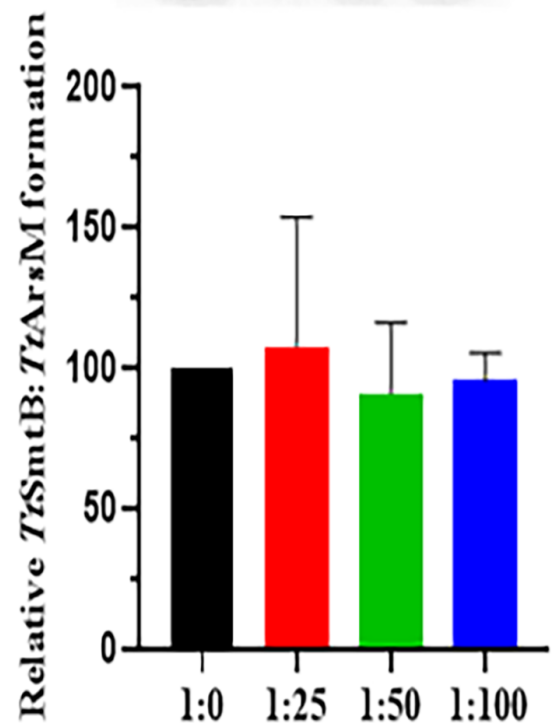



**Fig. 4 A**

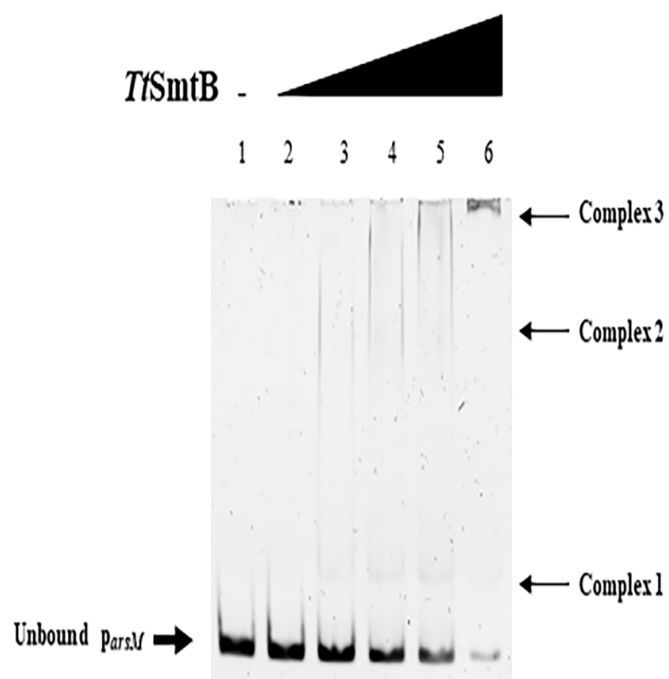

**B**

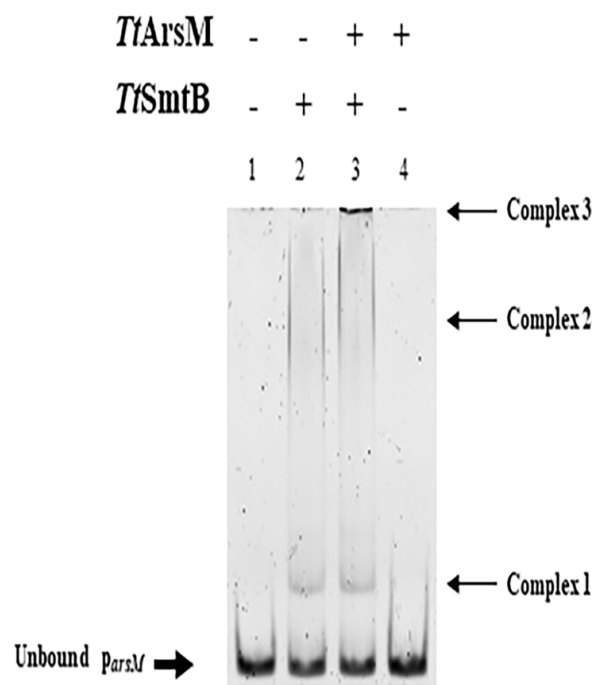



**Fig. 5**

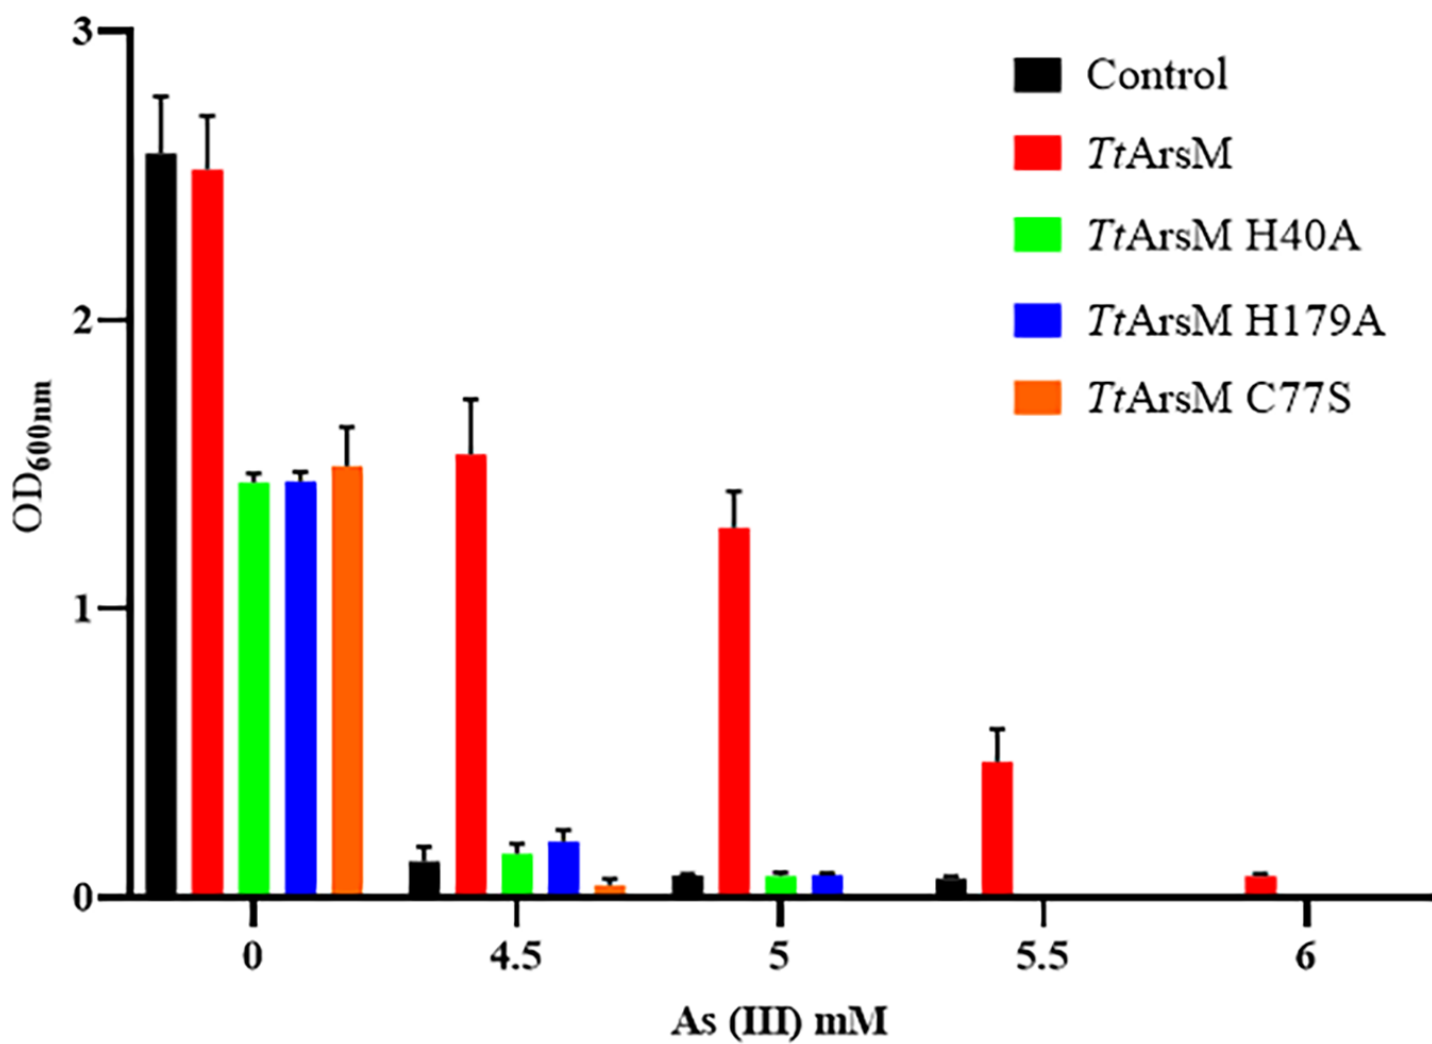

**Fig. 6**

**A**

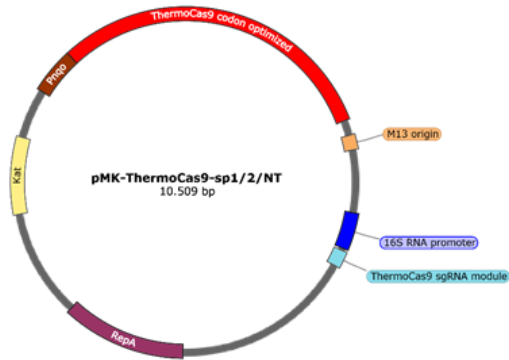

**C**

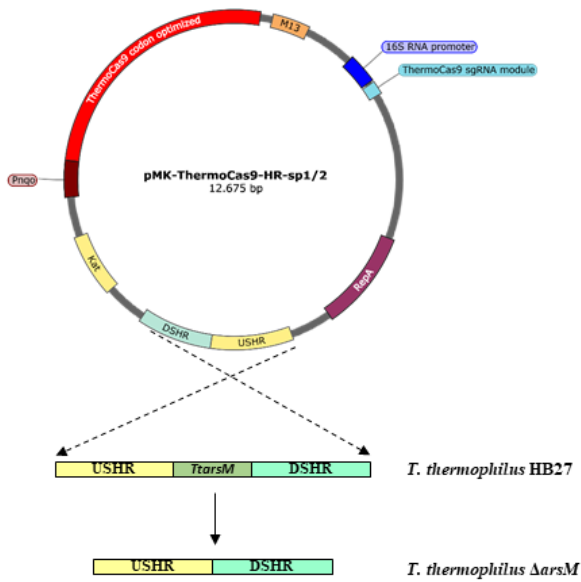

**B**

**ThermoCas9 targeting assay (CFUs)**

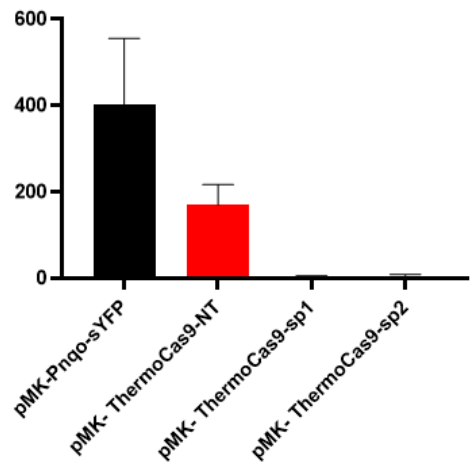

**D**

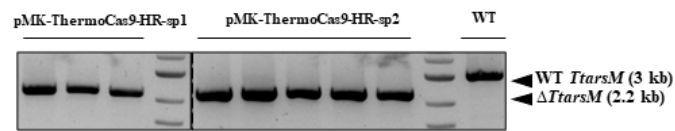

**Fig. 7**

**A** 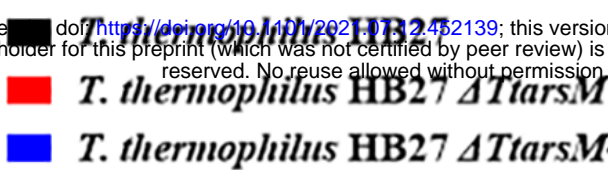 bioRxiv preprint doi: <https://doi.org/10.1101/2021.07.12.452139>; this version posted July 14, 2021. The copyright holder for this preprint (which was not certified by peer review) is the author/funder. All rights reserved. No reuse allowed without permission.

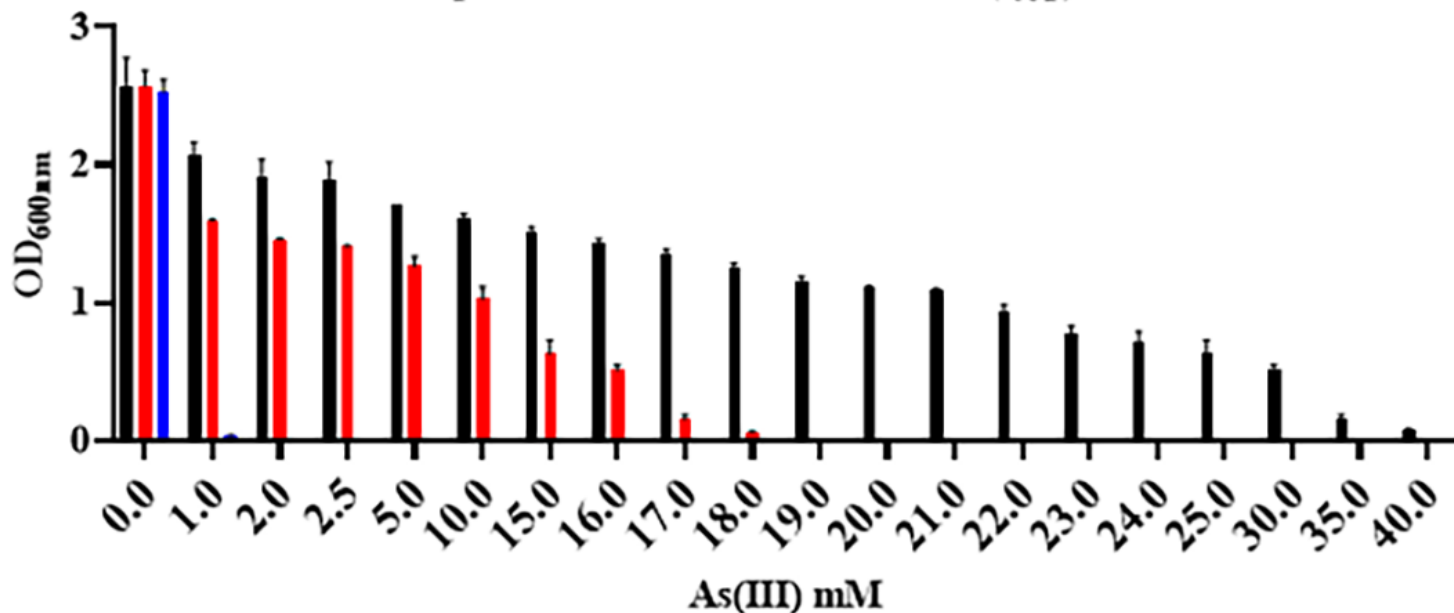

**B** 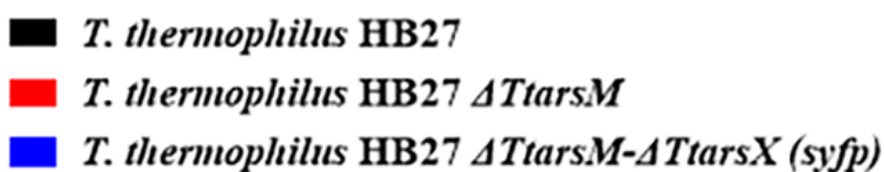

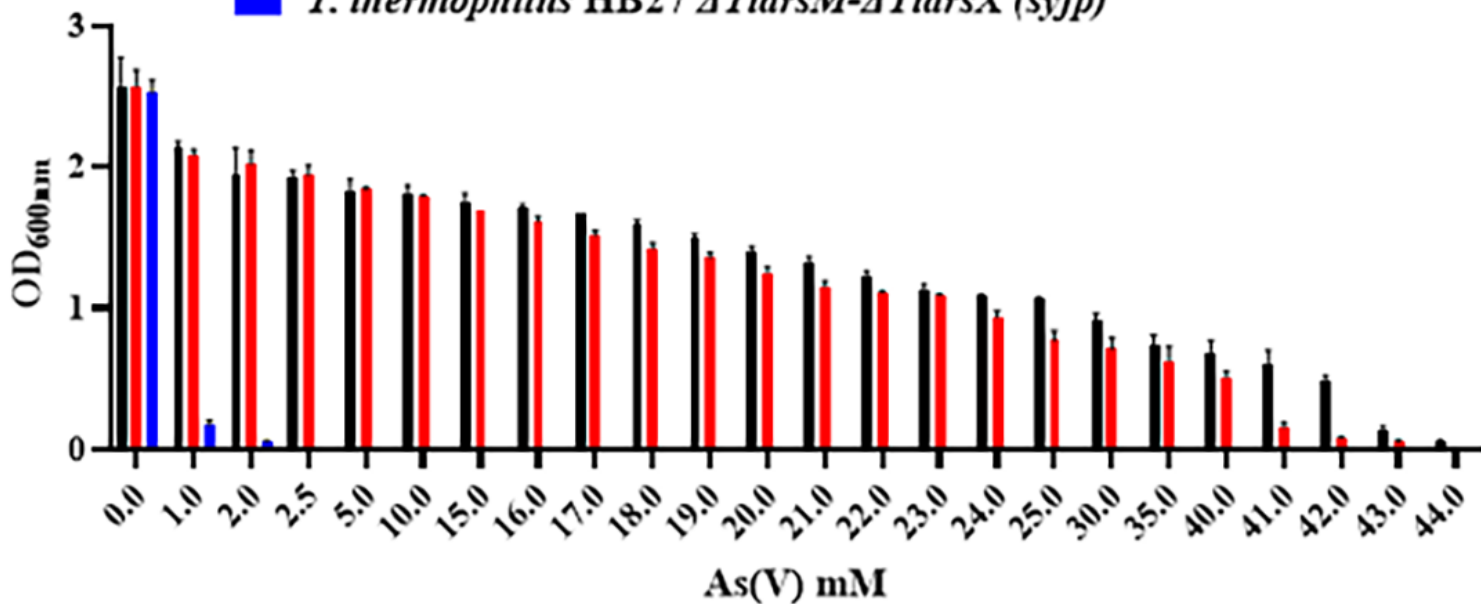

**Fig. 8**

**A**

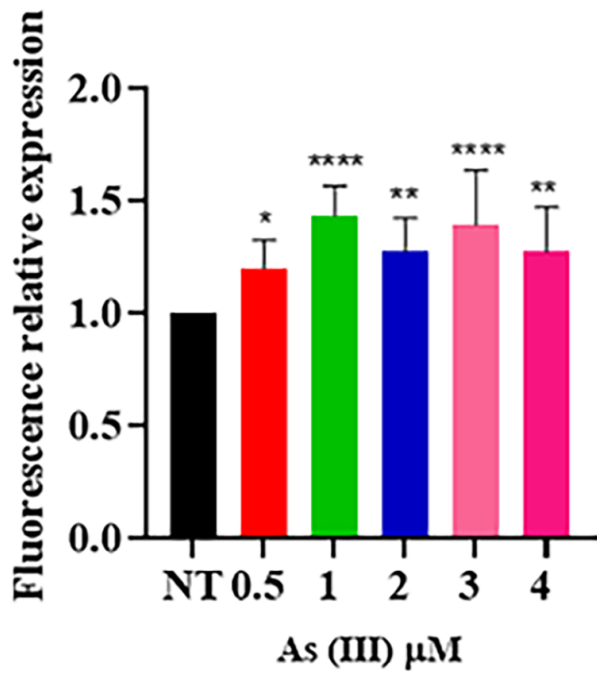

**B**

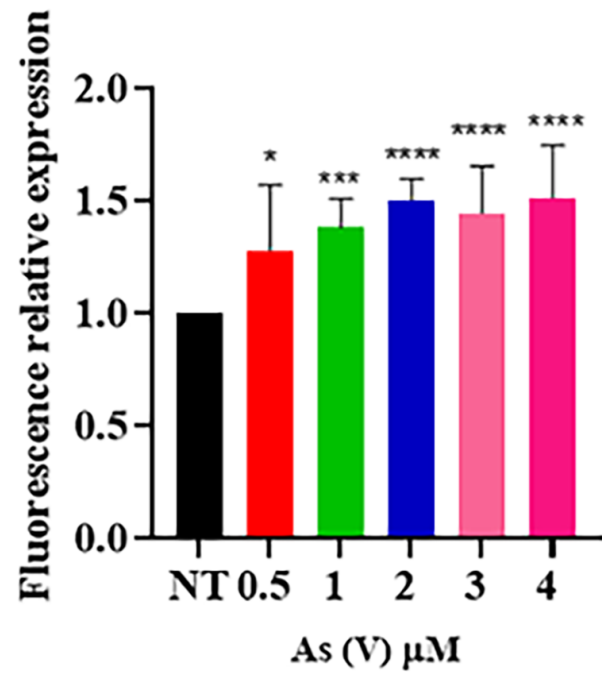

Source: https://www.biorxiv.org/content/10.1101/2021.07.12.452139v1.full.pdf
